# Supplementary material for: Coordinated cadherin functions sculpt respiratory motor circuit connectivity
Source: eLife. 2022 Dec 30;11:e82116. doi: 10.7554/eLife.82116 (PMC9910829; doi:10.7554/eLife.82116)
Supplement: Figure 1—source data 1. [file elife-82116-fig1-data1.xlsx]

## Sheet: 5-1-21 B litter
5/1/21 B litter mut
36						parameter						Ti	Te	PIF	PEF	TV	EV	RT	MV	f	EIP	EEP	Penh	EF50	RH	Tbox	Tbody	Patm	VCF	AV	Sr	n
206	2021-05-01	4:56:45 PM.164	00:03:07.485000	00:03:07.485000					163	382	384	478	355	1.65	2.46	0.57	0.26	64	41	72	4	203	6.75	0.01	-1	-1	-1	-1	10	474	33	1
207	2021-05-01	4:56:45 PM.890	00:03:08.211000	00:03:08.211000					164	385	385	377	164	1	1.5	0.24	0.14	73	27	111	3	30	1.86	0.86	-1	-1	-1	-1	10	475	100	1
208	2021-05-01	4:56:46 PM.672	00:03:08.993000	00:03:08.993000					165	386	386	598	501	1.8	4.21	0.71	0.73	272	39	55	3	112	1.97	3.16	-1	-1	-1	-1	10	475	100	1
209	2021-05-01	4:56:47 PM.356	00:03:09.677000	00:03:09.677000					166	387	387	202	145	1	1.16	0.14	0.1	79	24	173	3	22	0.97	1.05	-1	-1	-1	-1	10	476	100	1
210	2021-05-01	4:56:48 PM.049	00:03:10.370000	00:03:10.370000					167	388	388	543	491	2.35	4	0.84	0.59	118	49	58	3	83	5.38	1.1	-1	-1	-1	-1	10	476	100	1
211	2021-05-01	4:56:48 PM.870	00:03:11.191000	00:03:11.191000					168	389	389	328	352	1.5	2.94	0.3	0.3	100	26	88	3	217	4.95	2.91	-1	-1	-1	-1	10	477	100	1
212	2021-05-01	4:56:49 PM.609	00:03:11.930000	00:03:11.930000					169	390	390	386	400	1.72	2.56	0.37	0.29	101	28	76	3	144	4.41	2.38	-1	-1	-1	-1	10	477	100	1
213	2021-05-01	4:56:50 PM.352	00:03:12.673000	00:03:12.673000					170	391	391	329	321	1.13	2.82	0.23	0.36	147	21	92	3	113	2.95	2.54	-1	-1	-1	-1	10	477	100	1
214	2021-05-01	4:56:51 PM.076	00:03:13.397000	00:03:13.397000					171	392	392	421	397	1.33	2.82	0.31	0.34	121	23	73	4	56	4.83	2.8	-1	-1	-1	-1	10	478	100	1
215	2021-05-01	4:56:51 PM.901	00:03:14.222000	00:03:14.222000					172	393	393	415	556	1.66	4.25	0.4	0.88	382	25	62	4	104	1.17	4.13	-1	-1	-1	-1	10	478	100	1
																0.411			30.3	86
ctrl #2
153	2021-05-01	4:55:37 PM.206	00:01:59.527000	00:01:59.527000					111	235	235	824	379	2.7	5.52	1.57	1.12	170	79	50	4	72	2.51	3.47	-1	-1	-1	-1	10	359	100	1
154	2021-05-01	4:55:38 PM.398	00:02:00.719000	00:02:00.719000					112	236	236	846	406	2.09	6.1	1.27	1.19	185	61	48	4	96	3.48	4.93	-1	-1	-1	-1	10	360	100	1
155	2021-05-01	4:55:39 PM.720	00:02:02.041000	00:02:02.041000					113	237	237	895	388	1.81	6.18	1.19	1.25	205	56	47	8	79	3.04	5.94	-1	-1	-1	-1	10	362	100	1
156	2021-05-01	4:55:41 PM.172	00:02:03.493000	00:02:03.493000					114	238	238	1077	352	1.62	4.4	1.24	0.75	131	52	42	7	85	4.6	2.26	-1	-1	-1	-1	10	363	100	1
157	2021-05-01	4:55:42 PM.623	00:02:04.944000	00:02:04.944000					115	239	239	1103	423	2.04	7.08	1.3	1.46	210	51	39	6	103	3.52	6.68	-1	-1	-1	-1	10	364	100	1
158	2021-05-01	4:55:44 PM.286	00:02:06.607000	00:02:06.607000					116	240	240	1224	454	1.66	7.12	1.41	1.52	224	50	36	11	110	4.4	6.6	-1	-1	-1	-1	10	365	100	1
159	2021-05-01	4:55:45 PM.739	00:02:08.060000	00:02:08.060000					117	241	241	1009	431	1.56	6.47	1.04	1.21	197	43	42	6	126	4.93	6.31	-1	-1	-1	-1	10	367	100	1
160	2021-05-01	4:55:47 PM.549	00:02:09.870000	00:02:09.870000					118	242	242	1363	702	1.92	8.1	1.73	1.69	321	50	29	10	145	5.02	6.17	-1	-1	-1	-1	10	368	100	1
161	2021-05-01	4:55:49 PM.555	00:02:11.876000	00:02:11.876000					119	243	243	1317	447	1.81	8.06	1.46	1.63	200	49	34	5	163	5.5	7.69	-1	-1	-1	-1	10	370	100	1
162	2021-05-01	4:55:51 PM.261	00:02:13.582000	00:02:13.582000					120	244	244	1263	384	1.63	6.24	1.55	1.17	152	57	36	4	91	5.85	4.19	-1	-1	-1	-1	10	371	100	1
163	2021-05-01	4:55:52 PM.865	00:02:15.186000	00:02:15.186000					121	245	245	1217	539	1.66	7.94	1.39	1.55	214	48	34	5	167	7.28	7.68	-1	-1	-1	-1	10	373	100	1
164	2021-05-01	4:55:54 PM.797	00:02:17.118000	00:02:17.118000					122	246	246	1385	458	1.29	5.7	1.35	1.12	174	44	33	7	138	7.24	4.83	-1	-1	-1	-1	10	374	100	1
284	2021-05-01	4:58:02 PM.880	00:04:25.201000	00:04:25.201000					240	579	579	640	445	2.48	8.09	1.07	1.73	262	59	55	8	95	2.28	8.07	-1	-1	-1	-1	10	518	100	1
285	2021-05-01	4:58:04 PM.007	00:04:26.328000	00:04:26.328000					241	580	580	688	155	1.99	5.51	0.94	0.57	86	67	71	2	18	2.22	5.16	-1	-1	-1	-1	10	519	100	1
286	2021-05-01	4:58:04 PM.971	00:04:27.292000	00:04:27.292000					242	581	581	876	283	2.52	7.25	0.75	0.91	123	39	52	1	78	3.75	6.45	-1	-1	-1	-1	10	520	100	1
287	2021-05-01	4:58:05 PM.798	00:04:28.119000	00:04:28.119000					243	582	582	494	277	1.85	2.21	0.6	0.29	80	47	78	4	64	2.94	-0.07	-1	-1	-1	-1	10	520	100	1
288	2021-05-01	4:58:06 PM.917	00:04:29.238000	00:04:29.238000					244	583	583	832	442	2.17	6.29	1.28	1.27	200	60	47	4	96	3.5	4.94	-1	-1	-1	-1	10	522	100	1
289	2021-05-01	4:58:08 PM.002	00:04:30.323000	00:04:30.323000					245	584	584	639	473	1.99	6.68	0.9	1.36	243	49	54	5	154	3.17	6.64	-1	-1	-1	-1	10	522	100	1
292	2021-05-01	4:58:12 PM.254	00:04:34.575000	00:04:34.575000					248	588	588	1168	482	1.61	6.47	1.28	1.38	221	47	36	5	136	4.74	5.68	-1	-1	-1	-1	10	526	100	1
293	2021-05-01	4:58:13 PM.996	00:04:36.317000	00:04:36.317000					249	589	589	1263	597	2.06	8.31	1.86	1.84	237	60	32	5	213	6.14	3.18	-1	-1	-1	-1	10	528	100	1
294	2021-05-01	4:58:15 PM.488	00:04:37.809000	00:04:37.809000					250	590	590	904	676	2.14	8.35	1.38	1.59	324	53	38	4	187	4.25	6.86	-1	-1	-1	-1	10	529	100	1
295	2021-05-01	4:58:17 PM.078	00:04:39.399000	00:04:39.399000					251	591	591	922	370	1.4	3.61	0.97	0.57	105	45	46	3	85	6.51	1.13	-1	-1	-1	-1	10	530	100	1
296	2021-05-01	4:58:18 PM.676	00:04:40.997000	00:04:40.997000					252	592	592	1209	583	1.61	7.37	1.42	1.45	234	47	33	6	157	6.83	5.04	-1	-1	-1	-1	10	532	100	1
297	2021-05-01	4:58:20 PM.366	00:04:42.687000	00:04:42.687000					253	593	593	1109	486	1.75	6.09	1.38	1.2	177	52	38	4	142	6.06	4.14	-1	-1	-1	-1	10	533	100	1
298	2021-05-01	4:58:21 PM.951	00:04:44.272000	00:04:44.272000					254	594	594	1103	477	1.84	7.4	1.27	1.45	230	48	38	4	112	4.32	6.57	-1	-1	-1	-1	10	534	100	1
																1.264			52.52	43.52
ctrl #3
680	2021-05-01	5:05:25 PM.762	00:11:48.083000	00:11:48.083000					630	1696	1697	715	788	1.77	6.1	0.98	1.59	432	39	40	3	221	2.85	5.61	-1	-1	-1	-1	10	1295	50	1
681	2021-05-01	5:05:28 PM.010	00:11:50.331000	00:11:50.331000					631	1698	1698	1456	868	1.93	6.51	1.84	1.78	410	48	26	3	181	3.77	2.44	-1	-1	-1	-1	10	1297	100	1
682	2021-05-01	5:05:30 PM.081	00:11:52.402000	00:11:52.402000					632	1699	1699	1204	732	2.45	6.92	1.76	1.65	364	55	31	3	131	2.85	1.72	-1	-1	-1	-1	10	1299	100	1
683	2021-05-01	5:05:31 PM.354	00:11:53.675000	00:11:53.675000					633	1700	1700	563	193	1.38	1.86	0.46	0.21	67	37	79	3	40	2.53	0.01	-1	-1	-1	-1	10	1299	100	1
684	2021-05-01	5:05:32 PM.428	00:11:54.749000	00:11:54.749000					634	1701	1701	860	606	2.06	5.34	1.21	1.14	266	49	41	3	122	3.32	1.77	-1	-1	-1	-1	10	1300	100	1
685	2021-05-01	5:05:33 PM.550	00:11:55.871000	00:11:55.871000					635	1702	1702	522	241	1.12	1.57	0.36	0.19	83	28	79	4	77	2.66	0.74	-1	-1	-1	-1	10	1301	100	1
686	2021-05-01	5:05:34 PM.378	00:11:56.699000	00:11:56.699000					636	1703	1703	576	1135	1.22	4.2	0.47	0.83	297	16	35	3	133	9.71	4.09	-1	-1	-1	-1	10	1301	100	1
687	2021-05-01	5:05:36 PM.218	00:11:58.539000	00:11:58.539000					637	1704	1704	718	423	1.39	2.77	0.72	0.4	99	38	53	3	77	6.53	1	-1	-1	-1	-1	10	1302	100	1
688	2021-05-01	5:05:37 PM.299	00:11:59.620000	00:11:59.620000					638	1705	1705	642	786	2.09	7.59	0.82	1.67	517	35	42	5	134	1.89	7.13	-1	-1	-1	-1	10	1303	100	1
689	2021-05-01	5:05:39 PM.868	00:12:02.189000	00:12:02.189000					639	1706	1707	1030	677	2.28	6.09	1.58	1.13	155	56	35	4	146	8.99	1.45	-1	-1	-1	-1	10	1304	50	1
690	2021-05-01	5:05:41 PM.136	00:12:03.457000	00:12:03.457000					640	1708	1708	589	640	2	5.29	0.73	0.88	301	36	49	3	175	2.97	5.29	-1	-1	-1	-1	10	1305	100	1
691	2021-05-01	5:05:43 PM.373	00:12:05.694000	00:12:05.694000					641	1709	1710	664	891	1.4	5.52	0.61	1.36	531	23	39	4	260	2.68	5.26	-1	-1	-1	-1	10	1306	50	1
692	2021-05-01	5:05:45 PM.499	00:12:07.820000	00:12:07.820000					642	1711	1712	786	616	1.47	3.5	0.8	0.64	171	34	43	4	213	6.2	0.99	-1	-1	-1	-1	10	1306	50	1
693	2021-05-01	5:05:46 PM.693	00:12:09.014000	00:12:09.014000					643	1713	1713	582	308	1.28	2.74	0.45	0.36	117	30	67	4	88	3.48	2.59	-1	-1	-1	-1	10	1307	100	1
694	2021-05-01	5:05:47 PM.793	00:12:10.114000	00:12:10.114000					644	1714	1714	786	613	1.48	4.35	0.72	0.86	296	31	43	4	124	3.15	4.02	-1	-1	-1	-1	10	1308	100	1
																0.900667			37	46.8
							ctrl	TV			MV	f
								1.264			52.52	43.52
								0.900667			37	46.8
								1.08233			44.76	45.16
							mut
								0.411			30.3	86
								0.379735			0.676944	1.90434

## Sheet: 5-1-21 A litter
5/1/21 A litter mut
36						parameter						Ti	Te	PIF	PEF	TV	EV	RT	MV	f	EIP	EEP	Penh	EF50	RH	Tbox	Tbody	Patm	VCF	AV	Sr	n
797	2021-05-01	5:54:05 PM.138	00:12:56.453000	00:12:56.453000					748	2160	2164	664	210	0.56	4.06	0.25	0.5	134	17	69	3	47	4.14	3.86	-1	-1	-1	-1	10	2172	20	1
798	2021-05-01	5:54:06 PM.033	00:12:57.348000	00:12:57.348000					749	2165	2165	701	192	0.97	4.07	0.45	0.48	105	30	67	3	43	3.47	4.01	-1	-1	-1	-1	10	2172	100	1
799	2021-05-01	5:54:06 PM.842	00:12:58.157000	00:12:58.157000					750	2166	2166	608	188	0.97	3.03	0.43	0.35	96	33	75	4	39	2.98	2.91	-1	-1	-1	-1	10	2173	100	1
800	2021-05-01	5:54:07 PM.682	00:12:58.997000	00:12:58.997000					751	2167	2167	672	187	1.02	3.22	0.47	0.35	88	33	70	1	37	3.55	2.72	-1	-1	-1	-1	10	2173	100	1
801	2021-05-01	5:54:08 PM.654	00:12:59.969000	00:12:59.969000					752	2168	2168	767	164	0.87	2.76	0.45	0.29	80	29	64	4	25	3.32	2.24	-1	-1	-1	-1	10	2174	100	1
802	2021-05-01	5:54:09 PM.427	00:13:00.742000	00:13:00.742000					753	2169	2169	652	161	1.66	3.82	0.86	0.37	49	64	74	2	26	5.26	0.01	-1	-1	-1	-1	10	2175	100	1
807	2021-05-01	5:54:16 PM.583	00:13:07.898000	00:13:07.898000					758	2178	2180	263	480	1.12	2.19	0.18	0.29	161	15	81	3	107	3.86	2.1	-1	-1	-1	-1	10	2176	33	1
808	2021-05-01	5:54:18 PM.095	00:13:09.410000	00:13:09.410000					759	2181	2182	273	220	0.68	1	0.09	0.09	83	11	122	2	9	2.42	0.95	-1	-1	-1	-1	10	2176	50	1
167	2021-05-01	5:43:09 PM.628	00:02:00.943000	00:02:00.943000					125	304	305	547	521	0.69	2.43	0.19	0.42	307	11	56	4	123	2.44	2.23	-1	-1	-1	-1	10	359	50	1
168	2021-05-01	5:43:11 PM.471	00:02:02.786000	00:02:02.786000					126	306	307	700	473	0.81	1.55	0.33	0.2	105	17	51	4	163	6.73	0.93	-1	-1	-1	-1	10	359	50	1
169	2021-05-01	5:43:12 PM.406	00:02:03.721000	00:02:03.721000					127	308	308	459	468	0.74	1.91	0.22	0.28	165	14	65	4	107	4.76	1.89	-1	-1	-1	-1	10	359	100	1
170	2021-05-01	5:43:13 PM.405	00:02:04.720000	00:02:04.720000					128	309	309	539	401	0.59	1.78	0.19	0.31	253	12	64	3	100	1.75	1.7	-1	-1	-1	-1	10	359	100	1
171	2021-05-01	5:43:14 PM.228	00:02:05.543000	00:02:05.543000					129	310	310	415	346	0.48	1.02	0.13	0.11	104	10	79	4	117	4.96	0.99	-1	-1	-1	-1	10	360	100	1
172	2021-05-01	5:43:15 PM.131	00:02:06.446000	00:02:06.446000					130	311	311	540	327	0.69	1.19	0.27	0.19	140	19	69	3	35	2.29	0.36	-1	-1	-1	-1	10	360	100	1
																0.322143			22.5	71.8571
ctrl #1
684	2021-05-01	5:50:37 PM.823	00:09:29.138000	00:09:29.138000					638	1785	1785	1048	358	2.55	7.87	1.78	1.64	197	76	43	2	81	2.52	7.86	-1	-1	-1	-1	10	1386	100	1
685	2021-05-01	5:50:39 PM.601	00:09:30.916000	00:09:30.916000					639	1786	1786	1336	396	3.67	11.17	2.74	2.78	263	95	35	2	66	1.54	9.93	-1	-1	-1	-1	10	1389	100	1
687	2021-05-01	5:50:44 PM.422	00:09:35.737000	00:09:35.737000					641	1790	1790	1227	816	2.84	5.48	2.08	1.67	252	61	29	6	232	4.32	3.88	-1	-1	-1	-1	10	1394	100	1
688	2021-05-01	5:50:46 PM.272	00:09:37.587000	00:09:37.587000					642	1791	1791	1002	695	2.04	5.28	1.17	1.41	278	41	35	7	216	3.89	5.15	-1	-1	-1	-1	10	1395	100	1
689	2021-05-01	5:50:48 PM.492	00:09:39.807000	00:09:39.807000					643	1792	1792	1524	728	1.96	6.21	1.8	1.56	227	48	27	6	281	7	5.44	-1	-1	-1	-1	10	1397	100	1
690	2021-05-01	5:50:50 PM.560	00:09:41.875000	00:09:41.875000					644	1793	1793	1316	532	1.48	5.87	1.2	1.23	211	39	32	10	245	6.04	5.8	-1	-1	-1	-1	10	1398	100	1
691	2021-05-01	5:50:52 PM.789	00:09:44.104000	00:09:44.104000					645	1794	1794	1785	565	1.04	6.85	1.06	1.21	198	27	26	10	126	12.16	5.52	-1	-1	-1	-1	10	1399	100	1
692	2021-05-01	5:50:54 PM.891	00:09:46.206000	00:09:46.206000					646	1795	1795	1530	707	1.37	6.67	1.49	1.36	226	40	27	9	282	10.36	4.91	-1	-1	-1	-1	10	1401	100	1
693	2021-05-01	5:50:57 PM.013	00:09:48.328000	00:09:48.328000					647	1796	1796	1381	695	1.96	5.27	1.71	1.47	240	49	29	4	189	5.09	4.32	-1	-1	-1	-1	10	1403	100	1
994	2021-05-01	5:57:16 PM.633	00:16:07.948000	00:16:07.948000					943	2766	2766	494	728	1.93	5.61	0.34	0.23	622	16	49	96	19	0.5	4.19	-1	-1	-1	-1	10	2782	100	1
995	2021-05-01	5:57:18 PM.191	00:16:09.506000	00:16:09.506000					944	2767	2767	877	277	2.61	6.36	1.53	1.16	160	80	52	1	47	1.78	6.36	-1	-1	-1	-1	10	2783	100	1
996	2021-05-01	5:57:19 PM.298	00:16:10.613000	00:16:10.613000					945	2768	2768	861	265	1.84	7.11	1.05	1.33	166	56	53	1	55	2.31	6.82	-1	-1	-1	-1	10	2784	100	1
997	2021-05-01	5:57:20 PM.517	00:16:11.832000	00:16:11.832000					946	2769	2769	962	190	2.03	7.34	0.92	1.02	135	48	52	1	22	1.48	6.77	-1	-1	-1	-1	10	2785	100	1
998	2021-05-01	5:57:21 PM.595	00:16:12.910000	00:16:12.910000					947	2770	2770	996	562	3.19	7.59	1.94	1.6	224	75	39	1	149	3.59	3.05	-1	-1	-1	-1	10	2787	100	1
999	2021-05-01	5:57:23 PM.953	00:16:15.268000	00:16:15.268000					948	2771	2772	910	550	2.72	7.42	1.72	1.8	218	71	41	1	154	4.15	7.41	-1	-1	-1	-1	10	2789	50	1
1000	2021-05-01	5:57:24 PM.957	00:16:16.272000	00:16:16.272000					949	2773	2773	513	576	2.47	6.09	0.72	0.71	118	40	55	4	139	9.57	6.02	-1	-1	-1	-1	10	2790	100	1
1004	2021-05-01	5:57:28 PM.831	00:16:20.146000	00:16:20.146000					953	2779	2779	710	765	2.8	6.38	0.86	1.65	534	35	41	1	117	0.99	4.25	-1	-1	-1	-1	10	2792	100	1
1005	2021-05-01	5:57:30 PM.419	00:16:21.734000	00:16:21.734000					954	2780	2780	739	197	2.25	3.98	1.03	0.48	75	66	64	3	36	2.88	0.02	-1	-1	-1	-1	10	2793	100	1
1006	2021-05-01	5:57:31 PM.527	00:16:22.842000	00:16:22.842000					955	2781	2782	669	527	2.37	4.3	0.87	0.61	113	44	50	4	116	6.64	1.29	-1	-1	-1	-1	10	2794	50	1
1007	2021-05-01	5:57:32 PM.564	00:16:23.879000	00:16:23.879000					956	2783	2783	501	229	1.84	3.47	0.52	0.45	121	43	82	4	51	1.68	3.36	-1	-1	-1	-1	10	2794	100	1
1008	2021-05-01	5:57:33 PM.654	00:16:24.969000	00:16:24.969000					957	2784	2785	720	666	2.27	4.44	1.03	0.69	124	44	43	3	221	8.53	0.98	-1	-1	-1	-1	10	2795	50	1
1009	2021-05-01	5:57:35 PM.075	00:16:26.390000	00:16:26.390000					958	2786	2786	752	868	2.34	5.35	1.13	1.32	467	42	37	5	148	1.96	1.79	-1	-1	-1	-1	10	2797	100	1
1010	2021-05-01	5:57:36 PM.338	00:16:27.653000	00:16:27.653000					959	2787	2787	382	240	1.34	2.76	0.26	0.43	167	25	96	3	36	0.9	2.68	-1	-1	-1	-1	10	2797	100	1
1011	2021-05-01	5:57:37 PM.524	00:16:28.839000	00:16:28.839000					960	2788	2788	960	795	3.19	4.82	1.77	0.97	135	61	34	5	115	7.4	0.66	-1	-1	-1	-1	10	2799	100	1
																1.28			50.9167	44.625
ctrl #7
1088	2021-05-01	5:58:51 PM.215	00:17:42.530000	00:17:42.530000					1036	3014	3016	566	318	1.51	2.41	0.52	0.32	100	35	68	6	115	3.48	1.45	-1	-1	-1	-1	10	3087	33	1
1089	2021-05-01	5:58:52 PM.111	00:17:43.426000	00:17:43.426000					1037	3017	3017	588	597	1.75	3.76	0.61	0.71	235	31	51	3	196	3.31	3.41	-1	-1	-1	-1	10	3088	100	1
1090	2021-05-01	5:58:53 PM.274	00:17:44.589000	00:17:44.589000					1038	3018	3018	553	553	1.54	4.08	0.55	0.79	246	30	54	3	195	3.3	4.06	-1	-1	-1	-1	10	3088	100	1
1091	2021-05-01	5:58:54 PM.501	00:17:45.816000	00:17:45.816000					1039	3019	3019	687	636	2.02	4.03	0.87	0.94	309	40	45	4	121	2.11	1.13	-1	-1	-1	-1	10	3089	100	1
1092	2021-05-01	5:58:57 PM.487	00:17:48.802000	00:17:48.802000					1040	3020	3022	708	456	1.62	2.73	0.79	0.4	94	41	52	3	224	6.49	0.49	-1	-1	-1	-1	10	3090	33	1
1093	2021-05-01	5:58:58 PM.639	00:17:49.954000	00:17:49.954000					1041	3023	3023	673	578	1.62	3.71	0.65	0.76	234	31	48	6	200	3.36	3.47	-1	-1	-1	-1	10	3091	100	1
1094	2021-05-01	5:59:00 PM.615	00:17:51.930000	00:17:51.930000					1042	3024	3025	653	1248	3.11	6.77	1.29	2.09	722	41	32	3	179	1.59	3.94	-1	-1	-1	-1	10	3092	50	1
1095	2021-05-01	5:59:02 PM.586	00:17:53.901000	00:17:53.901000					1043	3026	3026	749	129	0.8	2.01	0.28	0.16	65	19	68	8	18	2.49	1.47	-1	-1	-1	-1	10	3092	100	1
																0.695			33.5	52.25
							ctrl	TV			MV	f
								1.28			50.9167	44.625
								0.695			33.5	52.25
								0.9875			42.2083	48.4375
							mut
								0.322143			22.5	71.8571
								0.326221			0.53307	1.4835

## Sheet: 5-5-21
5/5/21 mut
36						parameter						Ti	Te	PIF	PEF	TV	EV	RT	MV	f	EIP	EEP	Penh	EF50	RH	Tbox	Tbody	Patm	VCF	AV	Sr	n
73	2021-05-05	12:46:07 PM.913	00:00:44.112000	00:00:44.112000					32	96	96	983	222	1.34	4.61	0.9	0.55	90	45	50	8	56	5.03	3.16	-1	-1	-1	-1	10	2	100	1
74	2021-05-05	12:46:09 PM.016	00:00:45.215000	00:00:45.215000					33	97	97	893	283	1.28	4.12	0.84	0.4	58	43	51	4	88	12.48	-0.17	-1	-1	-1	-1	10	3	100	1
75	2021-05-05	12:46:10 PM.009	00:00:46.208000	00:00:46.208000					34	98	98	655	408	2.12	2.1	0.92	0.46	124	52	56	5	89	2.26	0.39	-1	-1	-1	-1	10	4	100	1
76	2021-05-05	12:46:10 PM.934	00:00:47.133000	00:00:47.133000					35	99	99	510	492	1.6	2.5	0.51	0.64	268	30	60	4	105	1.31	2.48	-1	-1	-1	-1	10	5	100	1
77	2021-05-05	12:46:14 PM.344	00:00:50.543000	00:00:50.543000					36	100	102	926	169	1.32	3.97	0.84	0.43	66	46	55	3	31	4.7	0.49	-1	-1	-1	-1	10	6	33	1
78	2021-05-05	12:46:15 PM.212	00:00:51.411000	00:00:51.411000					37	103	103	715	391	1.76	5.08	0.94	0.77	182	51	54	5	99	3.32	2.66	-1	-1	-1	-1	10	6	100	1
79	2021-05-05	12:46:16 PM.571	00:00:52.770000	00:00:52.770000					38	104	104	930	205	0.69	4.63	0.35	0.52	127	18	53	10	43	4.1	4.54	-1	-1	-1	-1	10	7	100	1
80	2021-05-05	12:46:17 PM.432	00:00:53.631000	00:00:53.631000					39	105	105	674	191	1.38	4.92	0.57	0.55	106	40	69	8	40	2.86	4.85	-1	-1	-1	-1	10	7	100	1
81	2021-05-05	12:46:18 PM.427	00:00:54.626000	00:00:54.626000					40	106	106	805	186	1.45	4.46	0.92	0.5	72	56	61	5	39	4.87	1.9	-1	-1	-1	-1	10	8	100	1
82	2021-05-05	12:46:19 PM.351	00:00:55.550000	00:00:55.550000					41	107	107	748	368	1.68	4.52	0.96	0.54	94	52	54	4	82	7.85	0.87	-1	-1	-1	-1	10	9	100	1
83	2021-05-05	12:46:20 PM.399	00:00:56.598000	00:00:56.598000					42	108	108	595	446	1.72	2.93	0.65	0.7	225	37	58	6	93	1.67	2.86	-1	-1	-1	-1	10	10	100	1
84	2021-05-05	12:46:21 PM.331	00:00:57.530000	00:00:57.530000					43	109	109	482	528	1.77	3.08	0.47	0.79	293	28	59	5	118	1.4	2.83	-1	-1	-1	-1	10	10	100	1
85	2021-05-05	12:46:22 PM.231	00:00:58.430000	00:00:58.430000					44	110	110	439	404	1.43	1.98	0.4	0.44	222	28	71	4	76	1.14	1.62	-1	-1	-1	-1	10	11	100	1
86	2021-05-05	12:46:23 PM.210	00:00:59.409000	00:00:59.409000					45	111	111	492	534	1.75	3.15	0.56	0.75	272	33	58	4	113	1.73	3.06	-1	-1	-1	-1	10	11	100	1
87	2021-05-05	12:46:24 PM.022	00:01:00.221000	00:01:00.221000					46	112	112	357	420	1.39	2.57	0.26	0.57	261	20	77	4	89	1.13	2.55	-1	-1	-1	-1	10	12	100	1
88	2021-05-05	12:46:24 PM.959	00:01:01.158000	00:01:01.158000					47	113	113	470	546	1.89	2.61	0.48	0.51	176	28	59	4	268	2.91	2.58	-1	-1	-1	-1	10	12	100	1
245	2021-05-05	12:50:00 PM.847	00:04:37.046000	00:04:37.046000					201	483	483	589	467	1.87	2.44	0.7	0.46	143	40	57	5	180	2.95	1.85	-1	-1	-1	-1	10	936	100	1
246	2021-05-05	12:50:01 PM.801	00:04:38	00:04:38					202	484	484	545	497	1.96	2.51	0.55	0.46	157	32	58	4	129	2.77	1.93	-1	-1	-1	-1	10	936	100	1
247	2021-05-05	12:50:02 PM.827	00:04:39.026000	00:04:39.026000					203	485	485	512	423	1.55	1.95	0.46	0.32	126	30	64	5	193	2.97	1.33	-1	-1	-1	-1	10	937	100	1
248	2021-05-05	12:50:03 PM.702	00:04:39.901000	00:04:39.901000					204	486	486	469	421	1.84	2.12	0.5	0.37	182	34	67	3	130	1.52	1.61	-1	-1	-1	-1	10	937	100	1
249	2021-05-05	12:50:04 PM.600	00:04:40.799000	00:04:40.799000					205	487	487	474	399	1.77	2.1	0.43	0.28	102	30	69	4	153	3.46	0.89	-1	-1	-1	-1	10	937	100	1
250	2021-05-05	12:50:05 PM.430	00:04:41.629000	00:04:41.629000					206	488	488	428	410	1.63	2.3	0.36	0.33	147	25	72	4	61	2.53	1.71	-1	-1	-1	-1	10	938	100	1
251	2021-05-05	12:50:06 PM.260	00:04:42.459000	00:04:42.459000					207	489	489	415	508	1.55	2.73	0.3	0.53	217	20	65	5	220	2.36	2.7	-1	-1	-1	-1	10	938	100	1
252	2021-05-05	12:50:07 PM.203	00:04:43.402000	00:04:43.402000					208	490	490	455	441	1.95	2.13	0.54	0.33	118	36	67	5	84	2.99	0.45	-1	-1	-1	-1	10	939	100	1
253	2021-05-05	12:50:08 PM.075	00:04:44.274000	00:04:44.274000					209	491	491	418	519	1.63	2.35	0.42	0.43	331	27	64	3	73	0.82	0.27	-1	-1	-1	-1	10	939	100	1
254	2021-05-05	12:50:08 PM.899	00:04:45.098000	00:04:45.098000					210	492	492	304	518	1.23	2.29	0.23	0.34	305	17	73	4	122	1.3	2.29	-1	-1	-1	-1	10	939	100	1
255	2021-05-05	12:50:09 PM.769	00:04:45.968000	00:04:45.968000					211	493	493	363	448	1.45	1.93	0.31	0.28	272	23	74	4	65	0.86	0.31	-1	-1	-1	-1	10	940	100	1
256	2021-05-05	12:50:10 PM.575	00:04:46.774000	00:04:46.774000					212	494	494	335	418	1.28	2.3	0.26	0.49	239	21	80	3	106	1.34	2.28	-1	-1	-1	-1	10	940	100	1
257	2021-05-05	12:50:11 PM.428	00:04:47.627000	00:04:47.627000					213	495	495	463	484	1.85	1.99	0.5	0.31	139	32	63	6	72	2.66	0.59	-1	-1	-1	-1	10	940	100	1
258	2021-05-05	12:50:12 PM.303	00:04:48.502000	00:04:48.502000					214	496	496	380	423	1.36	1.83	0.27	0.22	108	20	75	4	61	3.92	1.12	-1	-1	-1	-1	10	941	100	1
259	2021-05-05	12:50:13 PM.071	00:04:49.270000	00:04:49.270000					215	497	497	346	572	1.3	2.13	0.24	0.37	332	16	65	3	151	1.18	2.12	-1	-1	-1	-1	10	941	100	1
260	2021-05-05	12:50:13 PM.945	00:04:50.144000	00:04:50.144000					216	498	498	300	490	1.36	2.3	0.22	0.35	325	17	76	4	75	0.86	2.3	-1	-1	-1	-1	10	941	100	1
																0.526875			32.0938	63.5625
ctrl #3
165	2021-05-05	12:48:15 PM.810	00:02:52.009000	00:02:52.009000					122	314	318	616	186	3.94	7.58	1.92	1.04	79	144	75	1	29	2.61	4.91	-1	-1	-1	-1	10	596	20	1
166	2021-05-05	12:48:16 PM.482	00:02:52.681000	00:02:52.681000					123	319	319	292	362	2.46	5.28	0.37	0.72	318	34	92	18	26	0.3	3.24	-1	-1	-1	-1	10	597	100	1
167	2021-05-05	12:48:17 PM.287	00:02:53.486000	00:02:53.486000					124	320	320	660	154	3.2	7.84	1.53	0.92	70	113	74	1	23	2.94	6.56	-1	-1	-1	-1	10	598	100	1
168	2021-05-05	12:48:18 PM.176	00:02:54.375000	00:02:54.375000					125	321	321	568	314	3.55	6.23	1.68	1.43	207	115	68	1	33	0.91	5.6	-1	-1	-1	-1	10	600	100	1
169	2021-05-05	12:48:18 PM.765	00:02:54.964000	00:02:54.964000					126	322	322	443	151	1.95	7.05	0.64	0.82	101	64	101	2	22	1.79	7.04	-1	-1	-1	-1	10	601	100	1
170	2021-05-05	12:48:19 PM.697	00:02:55.896000	00:02:55.896000					127	323	323	632	328	3.38	9.44	1.58	1.58	200	99	62	1	56	1.79	5.89	-1	-1	-1	-1	10	602	100	1
189	2021-05-05	12:48:42 PM.985	00:03:19.184000	00:03:19.184000					146	348	348	665	168	1.91	7.4	0.83	0.95	106	60	72	1	28	2.27	7.37	-1	-1	-1	-1	10	627	100	1
190	2021-05-05	12:48:43 PM.695	00:03:19.894000	00:03:19.894000					147	349	349	534	168	2.34	7.18	0.93	0.9	104	80	85	1	25	1.89	7.16	-1	-1	-1	-1	10	628	100	1
191	2021-05-05	12:48:44 PM.608	00:03:20.807000	00:03:20.807000					148	350	350	469	429	3.32	5.51	1.26	1.52	332	84	67	1	39	0.49	2.98	-1	-1	-1	-1	10	629	100	1
192	2021-05-05	12:48:45 PM.428	00:03:21.627000	00:03:21.627000					149	351	351	674	183	1.96	7.15	0.86	0.99	117	60	70	3	30	2.05	7.15	-1	-1	-1	-1	10	630	100	1
193	2021-05-05	12:48:46 PM.215	00:03:22.414000	00:03:22.414000					150	352	352	635	153	2.03	6.77	1.01	0.81	85	77	76	1	23	2.66	6.55	-1	-1	-1	-1	10	631	100	1
194	2021-05-05	12:48:47 PM.031	00:03:23.230000	00:03:23.230000					151	353	353	591	276	3.17	6.77	1.46	1.16	135	101	69	1	70	2.23	6.61	-1	-1	-1	-1	10	632	100	1
195	2021-05-05	12:48:47 PM.694	00:03:23.893000	00:03:23.893000					152	354	354	423	166	1.25	5.91	0.4	0.75	124	41	102	1	24	1.6	5.5	-1	-1	-1	-1	10	633	100	1
196	2021-05-05	12:48:48 PM.684	00:03:24.883000	00:03:24.883000					153	355	355	655	386	3.76	5.93	1.93	1.52	253	111	58	1	38	0.83	4.59	-1	-1	-1	-1	10	635	100	1
197	2021-05-05	12:48:49 PM.534	00:03:25.733000	00:03:25.733000					154	356	356	640	184	1.44	7.52	0.59	0.97	128	43	73	14	32	2.28	7.4	-1	-1	-1	-1	10	635	100	1
198	2021-05-05	12:48:50 PM.360	00:03:26.559000	00:03:26.559000					155	357	357	634	178	2.16	7.37	1.12	0.99	104	83	74	1	28	2.42	7.25	-1	-1	-1	-1	10	636	100	1
199	2021-05-05	12:48:51 PM.192	00:03:27.391000	00:03:27.391000					156	358	358	456	434	3.54	5.73	1.31	1.53	313	88	67	0	56	0.62	3.18	-1	-1	-1	-1	10	638	100	1
200	2021-05-05	12:48:51 PM.982	00:03:28.181000	00:03:28.181000					157	359	359	568	171	1.97	6.55	0.81	0.87	110	66	81	1	25	1.85	6.54	-1	-1	-1	-1	10	639	100	1
201	2021-05-05	12:48:52 PM.530	00:03:28.729000	00:03:28.729000					158	360	360	430	462	4.28	5.53	1.45	1.53	355	97	67	1	40	0.39	2.06	-1	-1	-1	-1	10	640	100	1
																1.14105			82.1053	75.4211
ctrl #4
432	2021-05-05	12:54:22 PM.982	00:08:59.181000	00:08:59.181000					384	952	962	657	489	2.15	3.61	0.81	0.5	104	42	52	4	251	6.22	1.3	-1	-1	-1	-1	10	2211	9	1
433	2021-05-05	12:54:23 PM.870	00:09:00.069000	00:09:00.069000					385	963	963	389	513	1.71	3.89	0.42	0.7	292	28	67	7	103	1.72	3.8	-1	-1	-1	-1	10	2211	100	1
434	2021-05-05	12:54:24 PM.943	00:09:01.142000	00:09:01.142000					386	964	964	569	581	1.93	4.12	0.59	0.76	226	31	52	5	149	3.35	4.1	-1	-1	-1	-1	10	2212	100	1
435	2021-05-05	12:54:26 PM.829	00:09:03.028000	00:09:03.028000					387	965	966	531	225	1.36	2.07	0.42	0.26	97	34	79	3	42	2.01	1.23	-1	-1	-1	-1	10	2212	50	1
436	2021-05-05	12:54:27 PM.780	00:09:03.979000	00:09:03.979000					388	967	967	714	493	2.73	4.35	1.1	0.71	123	55	50	6	92	4.78	1.52	-1	-1	-1	-1	10	2213	100	1
437	2021-05-05	12:54:28 PM.829	00:09:05.028000	00:09:05.028000					389	968	968	562	533	2.04	4.19	0.61	0.65	156	33	55	3	174	4.96	4.04	-1	-1	-1	-1	10	2214	100	1
438	2021-05-05	12:54:29 PM.728	00:09:05.927000	00:09:05.927000					390	969	969	366	194	1.54	3.79	0.37	0.44	120	40	107	4	37	1.52	3.75	-1	-1	-1	-1	10	2214	100	1
580	2021-05-05	12:56:58 PM.384	00:11:34.583000	00:11:34.583000					530	1325	1327	457	202	1.23	5.99	0.3	0.53	148	27	91	9	28	1.78	5.81	-1	-1	-1	-1	10	3020	33	1
581	2021-05-05	12:56:59 PM.007	00:11:35.206000	00:11:35.206000					531	1328	1328	453	174	1.57	4.83	0.43	0.5	115	41	96	8	24	1.58	3.78	-1	-1	-1	-1	10	3020	100	1
582	2021-05-05	12:56:59 PM.748	00:11:35.947000	00:11:35.947000					532	1329	1329	541	142	1.11	4.74	0.41	0.41	91	36	88	25	20	2.4	4.71	-1	-1	-1	-1	10	3021	100	1
583	2021-05-05	12:57:01 PM.758	00:11:37.957000	00:11:37.957000					533	1330	1332	349	448	1.41	2.96	0.27	0.22	300	21	75	2	52	1.03	2.52	-1	-1	-1	-1	10	3021	33	1
																0.520909			35.2727	73.8182
							ctrl	TV			MV	f
								1.14105			82.1053	75.4211
								0.520909			35.2727	73.8182
								0.830981			58.689	74.6196
							mut
								0.526875			32.0938	63.5625
								0.63404			0.546844	0.85182

## Sheet: 7-22-21
7/22/21 mut
36						parameter						Ti	Te	PIF	PEF	TV	EV	RT	MV	f	EIP	EEP	Penh	EF50	RH	Tbox	Tbody	Patm	VCF	AV	Sr	n
225	2021-07-22	1:17:32 PM.681	00:04:10.119000	00:04:10.119000					182	475	475	892	307	1.72	4.34	0.77	0.34	44	39	50	3	161	15.11	0	-1	-1	-1	-1	10	807	100	1
226	2021-07-22	1:17:33 PM.742	00:04:11.180000	00:04:11.180000					183	476	476	727	634	1.69	1.96	0.73	0.72	316	32	44	4	121	1.17	1.73	-1	-1	-1	-1	10	808	100	1
227	2021-07-22	1:17:34 PM.743	00:04:12.181000	00:04:12.181000					184	477	477	434	153	1.16	2.4	0.23	0.21	100	23	102	2	16	1.09	1.66	-1	-1	-1	-1	10	808	100	1
228	2021-07-22	1:17:35 PM.474	00:04:12.912000	00:04:12.912000					185	478	478	567	251	1.35	2.97	0.45	0.4	108	33	73	1	54	2.91	2.22	-1	-1	-1	-1	10	809	100	1
229	2021-07-22	1:17:36 PM.181	00:04:13.619000	00:04:13.619000					186	479	479	396	457	1.55	1.62	0.41	0.29	140	29	70	3	58	2.36	0.92	-1	-1	-1	-1	10	809	100	1
568	2021-07-22	1:25:33 PM.270	00:12:10.708000	00:12:10.708000					518	1346	1346	269	221	1.22	1.62	0.21	0.2	108	25	122	2	44	1.4	1.56	-1	-1	-1	-1	10	2620	100	1
569	2021-07-22	1:25:33 PM.817	00:12:11.255000	00:12:11.255000					519	1347	1347	308	149	1.07	2.48	0.21	0.25	101	27	131	2	22	1.1	2.28	-1	-1	-1	-1	10	2620	100	1
570	2021-07-22	1:25:34 PM.155	00:12:11.593000	00:12:11.593000					520	1348	1348	133	243	0.54	0.58	0.04	0.08	186	6	160	14	33	0.33	0.32	-1	-1	-1	-1	10	2620	100	1
571	2021-07-22	1:25:36 PM.047	00:12:13.485000	00:12:13.485000					521	1349	1352	357	165	1.25	2.18	0.32	0.23	83	36	115	2	29	1.72	2.02	-1	-1	-1	-1	10	2620	25	1
572	2021-07-22	1:25:37 PM.418	00:12:14.856000	00:12:14.856000					522	1353	1355	578	146	1.17	1.73	0.17	0.18	99	14	83	408	16	0.7	1.68	-1	-1	-1	-1	10	2620	33	1
573	2021-07-22	1:25:38 PM.047	00:12:15.485000	00:12:15.485000					523	1356	1356	494	128	1.19	1.77	0.24	0.17	74	23	96	3	14	1.09	1.7	-1	-1	-1	-1	10	2621	100	1
574	2021-07-22	1:25:38 PM.267	00:12:15.705000	00:12:15.705000					524	1357	1357	133	259	1.29	0.38	0.1	0.06	105	15	153	7	36	0.43	0.21	-1	-1	-1	-1	10	2621	100	1
575	2021-07-22	1:25:38 PM.918	00:12:16.356000	00:12:16.356000					525	1358	1359	178	293	2.06	0.62	0.2	0.09	68	25	127	9	63	0.99	0	-1	-1	-1	-1	10	2621	50	1
576	2021-07-22	1:25:39 PM.997	00:12:17.435000	00:12:17.435000					526	1360	1361	333	120	0.92	1.59	0.16	0.14	77	22	132	1	12	0.97	1.53	-1	-1	-1	-1	10	2621	50	1
577	2021-07-22	1:25:40 PM.648	00:12:18.086000	00:12:18.086000					527	1362	1362	546	121	1.62	1.96	0.33	0.18	60	30	90	3	12	1.22	1.65	-1	-1	-1	-1	10	2621	100	1
578	2021-07-22	1:25:41 PM.519	00:12:18.957000	00:12:18.957000					528	1363	1364	242	137	0.66	1.75	0.08	0.18	109	12	158	2	17	0.68	1.5	-1	-1	-1	-1	10	2622	50	1
579	2021-07-22	1:25:42 PM.245	00:12:19.683000	00:12:19.683000					529	1365	1366	210	127	0.76	1.97	0.09	0.18	101	15	178	3	15	0.66	1.66	-1	-1	-1	-1	10	2622	50	1
580	2021-07-22	1:25:42 PM.508	00:12:19.946000	00:12:19.946000					530	1367	1367	102	225	1.06	0.47	0.06	0.06	138	11	183	9	40	0.28	0.45	-1	-1	-1	-1	10	2622	100	1
581	2021-07-22	1:25:43 PM.121	00:12:20.559000	00:12:20.559000					531	1368	1369	118	275	1.51	0.39	0.1	0.06	124	16	153	19	36	0.32	0.23	-1	-1	-1	-1	10	2622	50	1
582	2021-07-22	1:25:43 PM.698	00:12:21.136000	00:12:21.136000					532	1370	1370	294	127	0.72	2.09	0.11	0.19	98	16	143	2	14	0.85	1.78	-1	-1	-1	-1	10	2622	100	1
583	2021-07-22	1:25:44 PM.006	00:12:21.444000	00:12:21.444000					533	1371	1371	167	284	1.58	0.69	0.16	0.1	112	22	133	8	75	0.68	0.49	-1	-1	-1	-1	10	2622	100	1
584	2021-07-22	1:25:44 PM.550	00:12:21.988000	00:12:21.988000					534	1372	1372	281	123	0.61	2.24	0.09	0.21	101	13	149	3	13	0.8	1.91	-1	-1	-1	-1	10	2622	100	1
																0.239091			22	120.227
7/22/21 ctrl
137	2021-07-22	1:15:00 PM.891	00:01:38.329000	00:01:38.329000					96	237	239	812	333	0.93	2.37	0.38	0.39	239	20	52	101	39	1	2.33	-1	-1	-1	-1	10	239	33	1
138	2021-07-22	1:15:01 PM.972	00:01:39.410000	00:01:39.410000					97	240	240	857	205	1.17	5.62	0.5	0.65	144	28	56	25	29	2.04	5.59	-1	-1	-1	-1	10	240	100	1
139	2021-07-22	1:15:03 PM.043	00:01:40.481000	00:01:40.481000					98	241	241	883	183	1.47	6.57	0.61	0.72	124	34	56	19	26	2.13	6.56	-1	-1	-1	-1	10	240	100	1
140	2021-07-22	1:15:04 PM.197	00:01:41.635000	00:01:41.635000					99	242	242	957	204	1.61	3.41	0.79	0.42	93	41	52	9	33	2.53	1.68	-1	-1	-1	-1	10	241	100	1
141	2021-07-22	1:15:05 PM.419	00:01:42.857000	00:01:42.857000					100	243	243	1006	211	0.95	7.69	0.47	0.87	163	23	49	90	27	2.38	7.23	-1	-1	-1	-1	10	242	100	1
142	2021-07-22	1:15:06 PM.813	00:01:44.251000	00:01:44.251000					101	244	244	1196	192	2.21	9.11	0.98	1.08	129	43	43	12	27	2.01	9.07	-1	-1	-1	-1	10	243	100	1
143	2021-07-22	1:15:08 PM.046	00:01:45.484000	00:01:45.484000					102	245	245	1045	188	2.33	8.39	1	0.96	122	49	49	17	26	1.95	8.32	-1	-1	-1	-1	10	244	100	1
144	2021-07-22	1:15:09 PM.276	00:01:46.714000	00:01:46.714000					103	246	246	1045	185	2.27	8.71	0.95	1	122	46	49	19	27	1.98	8.7	-1	-1	-1	-1	10	244	100	1
315	2021-07-22	1:20:02 PM.780	00:06:40.218000	00:06:40.218000					270	724	724	267	595	0.98	2.18	0.17	0.32	173	12	70	7	206	5.42	1.93	-1	-1	-1	-1	10	1528	100	1
316	2021-07-22	1:20:04 PM.246	00:06:41.684000	00:06:41.684000					271	725	725	848	742	1.39	2.39	0.7	0.56	238	26	38	20	77	3.65	1.13	-1	-1	-1	-1	10	1529	100	1
317	2021-07-22	1:20:05 PM.725	00:06:43.163000	00:06:43.163000					272	726	726	784	1040	1.18	1.87	0.49	0.4	176	16	33	2	53	7.8	1.42	-1	-1	-1	-1	10	1529	100	1
318	2021-07-22	1:20:07 PM.344	00:06:44.782000	00:06:44.782000					273	727	727	574	429	0.89	2.23	0.33	0.42	214	20	60	3	101	2.52	2.14	-1	-1	-1	-1	10	1530	100	1
																0.614167			29.8333	50.5833
							ctrl	TV			MV	f
								0.614167			29.8333	50.5833
							mut
								0.239091			22	120.227
								0.389293			0.73743	2.37682

## Sheet: Sheet5
Summary
TV	MV	f
0.379735	0.676944	1.90434
0.326221	0.53307	1.4835
0.63404	0.546844	0.85182
0.389293	0.73743	2.37682
