# Supplementary material for: Coordinated cadherin functions sculpt respiratory motor circuit connectivity
Source: eLife. 2022 Dec 30;11:e82116. doi: 10.7554/eLife.82116 (PMC9910829; doi:10.7554/eLife.82116)
Supplement: Figure 2—source data 1. [file elife-82116-fig2-data1.xlsx]

## Sheet: Sheet1
Ctrl	X	Y	6910	X	Y	Ncad	X	Y	N6910	X	Y
	233.901	75.6333		241.1	72.5586		209.149	40.4572		204.6	45.3707
	227.854	78.548		237.14	77.7656		205.144	51.3733		217.738	47.5255
	207.677	75.6952		220.068	81.7941		200.343	37.3961		177.801	49.4066
										184.802	43.4079
