# Supplementary material for: Coordinated cadherin functions sculpt respiratory motor circuit connectivity
Source: eLife. 2022 Dec 30;11:e82116. doi: 10.7554/eLife.82116 (PMC9910829; doi:10.7554/eLife.82116)
Supplement: Figure 3—source data 1. [file elife-82116-fig3-data1.xlsx]

## Sheet: WT
1.18.21 #2 one side
	1	2	3	4	5	6	7	8	9	10	11	12	13
1			6.67446e+08	3.76418e+08	6.11064e+08	4.77578e+08	4.19903e+08	5.70784e+08	1.95091e+08
2			2.23959e+08	1.42365e+08	2.25466e+08	2.09717e+08	1.65841e+08	2.87426e+08	2.48906e+08
3			1.19829e+08	1.41795e+08	1.63446e+08	1.47259e+08	1.58286e+08	252662269	2.26892e+08
4			8.56065e+08	9.1761e+08	5.48135e+08	4.93031e+08	8.02711e+08	6.69854e+08	4.81765e+08
5			9.91788e+08	9.79116e+08	1.21185e+09	1.15979e+09	1.16009e+09	9.23752e+08	7.25651e+08
6			4.52973e+08	3.60258e+08	4.53574e+08	7.03635e+08	6.75787e+08	6.42192e+08	7.33231e+08
7			3.58902e+08	3.10678e+08	2.62885e+08	2.96378e+08	3.87484e+08	171924614	2.44614e+08
8			6.05221e+08	500209867	3.23357e+08	3.07988e+08	3.84661e+08	2.40801e+08	1.63561e+08
			4.27618e+09	3.72845e+09	3.79978e+09	3.79537e+09	4.15476e+09	3.7594e+09	3.01971e+09
	1	2	3	4	5	6	7	8	9	10	11	12	13
1			0.156085	0.100958	0.160816	0.125832	0.101065	0.151829	0.0646058		0.123027
2			0.0523736	0.0381835	0.0593366	0.055256	0.0399158	0.0764554	0.0824272		0.0577069
3			0.0280224	0.0380305	0.0430144	0.0387997	0.0380975	0.0672082	0.0751369		0.0469014
4			0.200194	0.24611	0.144254	0.129903	0.193203	0.178181	0.15954		0.178769
5			0.231933	0.262607	0.318927	0.305579	0.279219	0.245718	0.240305		0.269184
6			0.105929	0.0966242	0.119368	0.185393	0.162653	0.170823	0.242815		0.154801
7			0.0839305	0.0833264	0.0691843	0.0780894	0.0932627	0.045732	0.0810058		0.0763616
8			0.141533	0.13416	0.0850989	0.0811483	0.0925831	0.0640531	0.0541645		0.0932487
1.18.21 #3 two side
R side	1	2	3	4	5	6	7	8	9	10	11	12	13
1		1.83186e+08	3.4819e+08	3.22598e+08	3.31303e+08	3.07905e+08	3.58859e+08	3.15403e+08	3.23859e+08	237483159
2		1.26926e+08	1.25018e+08	1.4937e+08	1.53818e+08	1.68017e+08	1.97975e+08	1.59289e+08	2.26953e+08	1.69854e+08
3		1.40772e+08	1.23538e+08	1.51636e+08	150483249	2.08343e+08	1.9086e+08	2.02284e+08	2.28987e+08	2.30395e+08
4		5.09873e+08	6.21598e+08	7.02611e+08	7.11928e+08	3.25886e+08	6.64136e+08	4.91215e+08	4.19298e+08	2.75727e+08
5		2.66366e+08	7.00242e+08	7.70007e+08	8.4702e+08	7.83034e+08	6.11803e+08	5.16358e+08	4.82965e+08	2.39705e+08
6		1.38849e+08	2.58103e+08	3.30303e+08	4.90951e+08	3.0594e+08	1.85256e+08	2.61005e+08	3.51433e+08	3.66725e+08
7		1.22967e+08	216055202	201812818	153834084	1.24319e+08	1.11772e+08	1.23876e+08	9.48148e+07	1.31986e+08
8		2.9367e+08	3.97574e+08	3.75992e+08	2.64213e+08	336576671	1.19349e+08	1.32906e+08	8.67388e+07	8.31511e+07
		1.78261e+09	2.79032e+09	3.00433e+09	3.10355e+09	2.56002e+09	2.44001e+09	2.20234e+09	2.21505e+09	1.73503e+09
R side	1	2	3	4	5	6	7	8	9	10	11	12	13
1		0.102763	0.124785	0.107378	0.10675	0.120274	0.147073	0.143213	0.146208	0.136876		0.126147
2		0.0712023	0.0448042	0.0497182	0.0495619	0.065631	0.0811369	0.0723274	0.102459	0.0978971		0.0705265
3		0.0789698	0.0442738	0.0504724	0.0484875	0.0813832	0.078221	0.0918497	0.103378	0.132791		0.0788696
4		0.286026	0.22277	0.233866	0.229392	0.127298	0.272186	0.223043	0.189295	0.158918		0.215866
5		0.149425	0.250954	0.256299	0.27292	0.30587	0.250738	0.234459	0.218038	0.138156		0.230762
6		0.0778909	0.0924995	0.109942	0.15819	0.119507	0.0759245	0.118513	0.158657	0.211366		0.124721
7		0.0689816	0.0774303	0.067174	0.0495671	0.0485616	0.0458081	0.0562475	0.0428048	0.0760716		0.059183
8		0.164742	0.142483	0.12515	0.0851325	0.131474	0.0489132	0.0603479	0.0391589	0.047925		0.0939252
L side	1	2	3	4	5	6	7	8	9	10	11	12	13
1		3.70719e+08	1.72149e+08	3.68517e+08	4.36117e+08	4.41681e+08	2.36699e+08	3.19492e+08	2.17487e+08	1.86411e+08
2		1.47109e+08	1.70344e+08	135440095	1.31556e+08	2.04083e+08	1.68696e+08	2.72374e+08	169936995	1.79191e+08
3		1.31892e+08	1.70235e+08	1.36464e+08	1.81624e+08	1.95498e+08	1.51375e+08	1.68159e+08	1.7406e+08	1.97466e+08
4		470855049	4.9295e+08	8.3387e+08	8.10168e+08	5.24215e+08	3.49067e+08	4.65983e+08	3.27127e+08	3.56847e+08
5		6.83048e+08	374536136	6.03831e+08	7.4923e+08	549116189	8.2654e+08	5.57499e+08	5.01468e+08	6.03609e+08
6		3.08191e+08	2.5845e+08	2.31014e+08	3.7136e+08	4.83244e+08	2.84711e+08	3.55161e+08	4.23166e+08	3.23758e+08
7		1.41656e+08	1.39013e+08	1.67865e+08	2.46561e+08	1.44172e+08	9.00843e+07	1.18111e+08	1.65627e+08	1.90645e+08
8		3.38906e+08	2.97862e+08	3.86891e+08	3.72064e+08	1.68235e+08	1.0661e+08	1.24012e+08	1.34651e+08	67917814
		2.59238e+09	2.07554e+09	2.86389e+09	3.29868e+09	2.71024e+09	2.21378e+09	2.38079e+09	2.11352e+09	2.10584e+09
L side	1	2	3	4	5	6	7	8	9	10	11	12	13
1		0.143004	0.0829419	0.128677	0.13221	0.162967	0.106921	0.134196	0.102902	0.0885209		0.12026
2		0.0567466	0.0820723	0.0472923	0.0398813	0.0753007	0.0762025	0.114405	0.0804046	0.0850922		0.0730441
3		0.050877	0.0820194	0.04765	0.0550598	0.0721329	0.0683784	0.0706317	0.0823552	0.0937703		0.0692083
4		0.181631	0.237504	0.291167	0.245604	0.19342	0.157679	0.195726	0.154778	0.169455		0.202996
5		0.263483	0.180452	0.210843	0.22713	0.202608	0.373361	0.234165	0.237266	0.286635		0.246216
6		0.118884	0.124522	0.0806643	0.112578	0.178303	0.128609	0.149178	0.200218	0.153743		0.138522
7		0.0546432	0.066977	0.0586143	0.0747453	0.0531952	0.0406925	0.0496101	0.0783656	0.0905314		0.0630416
8		0.130732	0.143511	0.135093	0.112792	0.0620738	0.0481575	0.0520887	0.0637091	0.0322521		0.086712
11.25.20A #9 two side
R side	1	2	3	4	5	6	7	8	9	10	11	12	13
1			5.91137e+08	9.48662e+08	8.80627e+08	597337584	8.23282e+08	3.44477e+08	4.73833e+08	2.31664e+08
2			1.78868e+08	1.73219e+08	2.5287e+08	2.16092e+08	2.13989e+08	2.71472e+08	3.12185e+08	3.35929e+08
3			1.82774e+08	1.61914e+08	2.31757e+08	1.91612e+08	2.31034e+08	1.85463e+08	2.43081e+08	2.00063e+08
4			8.89846e+08	1.08201e+09	1.06721e+09	842607738	7.77603e+08	7.17047e+08	7.52619e+08	4.63849e+08
5			5.85151e+08	9.95754e+08	1.2913e+09	1.37221e+09	1.06405e+09	6.14137e+08	6.28831e+08	3.30998e+08
6			3.52929e+08	3.9091e+08	3.35767e+08	6.32366e+08	630474257	7.17703e+08	723279126	4.37844e+08
7			3.3537e+08	3.56778e+08	3.63002e+08	2.1495e+08	1.83399e+08	2.49524e+08	305684184	1.09549e+08
8			4.51738e+08	6.93558e+08	5.48056e+08	3.90055e+08	3.69433e+08	222334559	1.47686e+08	7.59255e+07
			3.56781e+09	4.80281e+09	4.97059e+09	4.45723e+09	4.29327e+09	3.32216e+09	3.5872e+09	2.18582e+09
R side	1	2	3	4	5	6	7	8	9	10	11	12	13
1			0.165686	0.197523	0.177168	0.134015	0.191761	0.103691	0.13209	0.105985		0.15099
2			0.0501337	0.0360662	0.0508733	0.0484812	0.0498428	0.0817156	0.0870276	0.153685		0.0697282
3			0.0512286	0.0337125	0.0466257	0.0429891	0.0538131	0.0558261	0.0677635	0.0915276		0.0554358
4			0.249409	0.225287	0.214705	0.189043	0.181121	0.215838	0.209807	0.212208		0.212177
5			0.164008	0.207328	0.259788	0.307861	0.247842	0.184861	0.175299	0.15143		0.212302
6			0.0989201	0.0813919	0.0675507	0.141874	0.146852	0.216035	0.201628	0.200311		0.14432
7			0.0939987	0.0742853	0.07303	0.048225	0.0427179	0.0751091	0.0852153	0.0501182		0.0678374
8			0.126615	0.144407	0.11026	0.0875106	0.0860495	0.0669247	0.0411702	0.0347355		0.087209
L side	1	2	3	4	5	6	7	8	9	10	11	12	13
1		7.60757e+08	6.89915e+08	7.43639e+08	5.8463e+08	3.85191e+08	5.0567e+08	3.03542e+08	2.5352e+08	622731871
2		1.92035e+08	2.01573e+08	2.57206e+08	2.19439e+08	2.15762e+08	2.68155e+08	2.9851e+08	2.42195e+08	3.98941e+08
3		1.77888e+08	1.91944e+08	2.41883e+08	2.14722e+08	2.5373e+08	2.07922e+08	2.74723e+08	2.27204e+08	3.09417e+08
4		5.79537e+08	1.08684e+09	1.12748e+09	1.00399e+09	781883332	6.41626e+08	8.27347e+08	4.86457e+08	7.16101e+08
5		9.11966e+08	8.06432e+08	8.83286e+08	1.19975e+09	1004804633	9.95145e+08	5.60582e+08	6.08945e+08	8.44473e+08
6		3.0027e+08	2.98408e+08	3.71213e+08	3.13446e+08	2.97226e+08	3.98041e+08	4.85555e+08	3.68612e+08	8.03751e+08
7		3.81414e+08	3.52345e+08	2.53414e+08	208622180	1.75926e+08	2.01665e+08	1.05307e+08	8.65312e+07	1.56426e+08
8		5.15805e+08	5.2849e+08	5.7892e+08	2.41022e+08	2.06103e+08	247450559	2.01214e+08	1.0859e+08	1.93405e+08
		3.81967e+09	4.15595e+09	4.45704e+09	3.98563e+09	3.32063e+09	3.46568e+09	3056779925	2382055504	4.04525e+09
L side	1	2	3	4	5	6	7	8	9	10	11	12	13
1		0.199168	0.166006	0.166846	0.146685	0.116	0.145908	0.0993014	0.106429	0.153942		0.144476
2		0.0502753	0.0485022	0.0577078	0.0550576	0.0649763	0.0773747	0.0976549	0.101675	0.0986197		0.072427
3		0.0465714	0.0461855	0.0542699	0.0538741	0.0764102	0.0599947	0.0898733	0.0953816	0.0764891		0.0665611
4		0.151724	0.261515	0.252966	0.251903	0.235463	0.185137	0.27066	0.204217	0.177023		0.221179
5		0.238755	0.194043	0.198178	0.30102	0.302595	0.287143	0.18339	0.255639	0.208757		0.241058
6		0.0786114	0.0718026	0.0832869	0.0786441	0.0895091	0.114852	0.158845	0.154745	0.19869		0.114332
7		0.0998553	0.0847808	0.056857	0.0523436	0.0529797	0.0581892	0.0344502	0.0363263	0.0386691		0.0571612
8		0.135039	0.127165	0.129889	0.0604728	0.0620674	0.0714004	0.0658254	0.0455866	0.0478105		0.0828062
		0.123027	0.126147	0.12026	0.15099	0.144476		0.13298
		0.0577069	0.0705265	0.0730441	0.0697282	0.072427		0.0686866
		0.0469014	0.0788696	0.0692083	0.0554358	0.0665611		0.0633952
		0.178769	0.215866	0.202996	0.212177	0.221179		0.206197
		0.269184	0.230762	0.246216	0.212302	0.241058		0.239904
		0.154801	0.124721	0.138522	0.14432	0.114332		0.135339
		0.0763616	0.059183	0.0630416	0.0678374	0.0571612		0.064717
		0.0932487	0.0939252	0.086712	0.087209	0.0828062		0.0887802
		0.277828	0.250868	0.258782	0.29531	0.258808
		0.447953	0.446628	0.449212	0.424479	0.462236

## Sheet: 6910
7.18.21 #3 one side
	1	2	3	4	5	6	7	8	9	10	11	12	13
1			2.68175e+08	8.22453e+08	3.98012e+08	4.1143e+08	655182863	4.12993e+08	3.00155e+08
2			6.92363e+07	1.56868e+08	1.01344e+08	1.03684e+08	1.52866e+08	1.47239e+08	190441156
3			6.94277e+07	1.3697e+08	9.33098e+07	8.89458e+07	1.39644e+08	1.58283e+08	1.94528e+08
4			3.9747e+08	6.03878e+08	7.4587e+08	554350324	3.76487e+08	5.01347e+08	571646593
5			4.40055e+08	1.03806e+09	6.53484e+08	5.69487e+08	4.62932e+08	2.74327e+08	3.58261e+08
6			3.5521e+08	4.62423e+08	3.91268e+08	2.734e+08	4.22535e+08	5.5826e+08	4.81973e+08
7			2.04356e+08	2.64033e+08	2.70914e+08	2.52082e+08	1.78265e+08	1.34449e+08	142333292
8			1.89851e+08	4.59049e+08	3.4513e+08	2.45478e+08	347958960	2.11679e+08	1.42071e+08
			1.99378e+09	3.94374e+09	2.99933e+09	2.49886e+09	2.73587e+09	2.39858e+09	2.38141e+09
	1	2	3	4	5	6	7	8	9	10	11	12	13
1			0.134506	0.208547	0.1327	0.164647	0.239479	0.172182	0.126041		0.1683
2			0.0347261	0.0397764	0.0337888	0.0414925	0.0558748	0.0613862	0.0799699		0.0495735
3			0.0348221	0.034731	0.0311102	0.0355946	0.0510418	0.0659903	0.0816861		0.0478537
4			0.199355	0.153123	0.248679	0.221842	0.137611	0.209018	0.240046		0.201382
5			0.220714	0.263218	0.217877	0.227899	0.169208	0.114371	0.150441		0.194818
6			0.178159	0.117255	0.130452	0.10941	0.154443	0.232746	0.20239		0.160694
7			0.102497	0.06695	0.0903248	0.100879	0.0651583	0.0560537	0.0597685		0.0773759
8			0.0952215	0.116399	0.115069	0.0982362	0.127184	0.0882519	0.0596583		0.100003
7.18.21 #1 two side
R side	1	2	3	4	5	6	7	8	9	10	11	12	13
1				1.64041e+08	4.98005e+08	6.08593e+08	6.73154e+08	3.5966e+08	2.81775e+08	3.94126e+08
2				7.81406e+07	1.20809e+08	1.27079e+08	1.21685e+08	1.07444e+08	1.47534e+08	1.33605e+08
3				8.79126e+07	1.14832e+08	2.90762e+08	2.11656e+08	2.13727e+08	1.92811e+08	2.56874e+08
4				6.14058e+08	9.45328e+08	1.0751e+09	1.00059e+09	4.88807e+08	4.63267e+08	5.67218e+08
5				3.84501e+08	5.68598e+08	1.07261e+09	9.08508e+08	476372281	4.74958e+08	5.45637e+08
6				1.9675e+08	2.49349e+08	4.58778e+08	3.93599e+08	1.78246e+08	2.95787e+08	2.98565e+08
7				2.19714e+08	1.81715e+08	2.45825e+08	3.94323e+08	2.27162e+08	2.00479e+08	2.08357e+08
8				2.19833e+08	3.32201e+08	4.35207e+08	4.64201e+08	275519453	3.41176e+08	372842141
				1.96495e+09	3.01084e+09	4.31396e+09	4.16771e+09	2.32694e+09	2.39779e+09	2.77722e+09
R side	1	2	3	4	5	6	7	8	9	10	11	12	13
1				0.0834837	0.165404	0.141075	0.161516	0.154564	0.117515	0.141914		0.137924
2				0.0397672	0.0401246	0.0294577	0.0291971	0.046174	0.0615293	0.0481075		0.042051
3				0.0447403	0.0381395	0.0674003	0.0507847	0.0918491	0.0804122	0.0924931		0.0665456
4				0.312506	0.313975	0.249215	0.240081	0.210065	0.193206	0.204239		0.246184
5				0.19568	0.188851	0.248638	0.217987	0.204721	0.198082	0.196469		0.207204
6				0.10013	0.0828172	0.106347	0.0944399	0.0766011	0.123358	0.107505		0.0987426
7				0.111817	0.0603536	0.0569836	0.0946137	0.0976228	0.08361	0.0750235		0.0828605
8				0.111877	0.110335	0.100883	0.11138	0.118404	0.142288	0.13425		0.118488
L side	1	2	3	4	5	6	7	8	9	10	11	12	13
1				5.05657e+08	7.62171e+08	3.23961e+08	2.38498e+08	3.03645e+08	4.40445e+08	3.11448e+08
2				1.03022e+08	1.4432e+08	1.26812e+08	1.15407e+08	1.14228e+08	1.56006e+08	148542349
3				1.27409e+08	1.83336e+08	1.62273e+08	1.52166e+08	1.42262e+08	1.95049e+08	1.23726e+08
4				8.01936e+08	1.37214e+09	1110209821	7.07235e+08	1.82546e+08	6.44446e+08	292381555
5				6.44233e+08	8.97894e+08	7.95317e+08	8.27417e+08	4.90802e+08	5.66162e+08	331327860
6				2.91726e+08	307577157	3.36709e+08	3.06729e+08	1.65517e+08	3.43788e+08	2.40094e+08
7				2.63636e+08	3.84123e+08	255553792	2.44279e+08	96503642	290564611	188708616
8				2.35923e+08	4.99546e+08	5.04125e+08	3.72307e+08	2.10842e+08	3.05338e+08	230976457
				2.97354e+09	4.5511e+09	3.61496e+09	2.96404e+09	1.70635e+09	2.9418e+09	1.86721e+09
L side	1	2	3	4	5	6	7	8	9	10	11	12	13
1				0.170052	0.167469	0.0896168	0.0804637	0.17795	0.14972	0.166799		0.143153
2				0.0346461	0.0317111	0.0350798	0.0389359	0.0669428	0.0530309	0.0795533		0.0485571
3				0.0428477	0.040284	0.0448894	0.0513373	0.0833726	0.0663026	0.0662627		0.0564709
4				0.269691	0.301495	0.307115	0.238605	0.106981	0.219065	0.156588		0.228506
5				0.216655	0.197291	0.220007	0.279152	0.287633	0.192454	0.177446		0.224377
6				0.0981073	0.067583	0.0931432	0.103483	0.0970008	0.116863	0.128585		0.100681
7				0.0886605	0.0844022	0.0706934	0.0824142	0.0565557	0.0987711	0.101065		0.0832231
8				0.0793407	0.109764	0.139455	0.125608	0.123564	0.103793	0.123702		0.115032
12.16.20 #6 one side
	1	2	3	4	5	6	7	8	9	10	11	12	13
1			5.50026e+08	3.97912e+08	2.8407e+08	2.65683e+08	2.20926e+08	2.45125e+08		3.56461e+08
2			1.15824e+08	1.26683e+08	1.78458e+08	98448480	1.03893e+08	1.08095e+08		2.54951e+08
3			1.65319e+08	69134017	1.05024e+08	7.44227e+07	1.16697e+08	8.70002e+07		1.92874e+08
4			7.91773e+08	2.51207e+08	5.02709e+08	3.03811e+08	2.88844e+08	2.34428e+08		4.2449e+08
5			5.88381e+08	6.00148e+08	7.27885e+08	4.89012e+08	4.59859e+08	2.56253e+08		477378795
6			3.94405e+08	3.96827e+08	2.94613e+08	442469394	3.83357e+08	3.78238e+08		4.5036e+08
7			4.24811e+08	4.28034e+08	2.05231e+08	3.32103e+08	1.51447e+08	1.30321e+08		1.75929e+08
8			5.11646e+08	416596944	328252691	3.67439e+08	1.93583e+08	1.93295e+08		1.77269e+08
			3.54219e+09	2.68654e+09	2.62624e+09	2.37339e+09	1.91861e+09	1.63276e+09		2.50971e+09
	1	2	3	4	5	6	7	8	9	10	11	12	13
1			0.155279	0.148113	0.108166	0.111943	0.115149	0.15013		0.142032		0.132973
2			0.0326986	0.0471548	0.067952	0.0414801	0.0541504	0.0662039		0.101586		0.0587465
3			0.0466716	0.0257335	0.0399901	0.0313571	0.0608237	0.0532843		0.0768511		0.0478159
4			0.223527	0.0935056	0.191418	0.128007	0.150549	0.143578		0.169139		0.157103
5			0.166107	0.22339	0.277158	0.20604	0.239684	0.156945		0.190212		0.208505
6			0.111345	0.147709	0.112181	0.186429	0.19981	0.231656		0.179447		0.16694
7			0.119929	0.159325	0.0781461	0.139928	0.0789359	0.0798165		0.0700993		0.10374
8			0.144444	0.155068	0.124989	0.154816	0.100898	0.118386		0.0706331		0.124176
		0.1683	0.137924	0.143153	0.132973		0.145588
		0.0495735	0.042051	0.0485571	0.0587465		0.0497321
		0.0478537	0.0665456	0.0564709	0.0478159		0.0546715
		0.201382	0.246184	0.228506	0.157103		0.208294
		0.194818	0.207204	0.224377	0.208505		0.208726
		0.160694	0.0987426	0.100681	0.16694		0.131764
		0.0773759	0.0828605	0.0832231	0.10374		0.0867999
		0.100003	0.118488	0.115032	0.124176		0.114425
		0.328994	0.236667	0.243834	0.299913
		0.3962	0.453388	0.452883	0.365609

## Sheet: Ncad
11.25.20B #1 one side
	1	2	3	4	5	6	7	8	9	10	11	12	13
1		5.31725e+08	7.03526e+08	3.54604e+08	6.09412e+08	5.77791e+08	4.92859e+08	2.89372e+08
2		1.30795e+08	133184354	1.44934e+08	1.99713e+08	2.17256e+08	2.68216e+08	1.45519e+08
3		1.52202e+08	1.28298e+08	2.2289e+08	2.58174e+08	2.01326e+08	2.49988e+08	1.32841e+08
4		2.49154e+08	5.09746e+08	1.0582e+09	5.82149e+08	6.93222e+08	3.39486e+08	1.56724e+08
5		8.43961e+08	1.13834e+09	1.42478e+09	6.44602e+08	1.00423e+09	9.80629e+08	9.14815e+08
6		3.23221e+08	5.04405e+08	3.25277e+08	5.67738e+08	5.83122e+08	2.27607e+08	3.55049e+08
7		1.32459e+08	1.25358e+08	1.16937e+08	1.45793e+08	9.57546e+07	5.01472e+07	7.98853e+07
8		2.49554e+08	3.18628e+08	1.86459e+08	1.57712e+08	1.03109e+08	8.20427e+07	6.62071e+07
		2.61307e+09	3561483023	3.83408e+09	3.16529e+09	3.47581e+09	2.69098e+09	2.14041e+09
	1	2	3	4	5	6	7	8	9	10	11	12	13
1		0.203486	0.197537	0.0924873	0.192529	0.166232	0.183153	0.135195		0.167231
2		0.0500541	0.0373958	0.0378014	0.0630945	0.0625051	0.0996725	0.0679864		0.0597871
3		0.0582463	0.0360236	0.0581338	0.0815641	0.057922	0.0928987	0.0620633		0.063836
4		0.0953491	0.143127	0.275998	0.183916	0.199442	0.126157	0.0732212		0.156745
5		0.322977	0.319625	0.37161	0.203647	0.288919	0.364414	0.427401		0.32837
6		0.123694	0.141628	0.0848382	0.179363	0.167766	0.0845818	0.165879		0.135393
7		0.0506911	0.0351982	0.0304994	0.0460597	0.0275489	0.0186353	0.0373224		0.0351364
8		0.0955021	0.089465	0.048632	0.0498256	0.0296647	0.0304881	0.030932		0.0535013
11.25.20B #2 two side
R side	1	2	3	4	5	6	7	8	9	10	11	12	13
1			4.82655e+08	5.70142e+08	5.2801e+08	3.2884e+08	6.99059e+08	2.61304e+08	3.82395e+08	3.10145e+08
2			2.20848e+08	2.21082e+08	1.47239e+08	1.14134e+08	2.6876e+08	1.24602e+08	2.62656e+08	2.43735e+08
3			8.63478e+07	1.42899e+08	9.43334e+07	1.00229e+08	1.15147e+08	1.03974e+08	151287570	136701490
4			4.64262e+08	4.71383e+08	3.4993e+08	3.06555e+08	3.0636e+08	3.08352e+08	3.21765e+08	2.05399e+08
5			6.43973e+08	1.07792e+09	1072135306	5.97673e+08	4.21808e+08	3.94466e+08	4.95264e+08	2.50321e+08
6			1.75068e+08	343543604	4.66723e+08	2.20364e+08	3.91225e+08	4.50924e+08	4.40326e+08	2.46206e+08
7			1.09196e+08	1.05359e+08	1.78312e+08	4.81053e+07	9.82429e+07	7.6766e+07	7.42019e+07	4.67636e+07
8			2.04262e+08	2.49396e+08	313538232	1.27294e+08	1.61318e+08	5.36993e+07	7.87578e+07	6.93831e+07
			2.38661e+09	3181723774	3.15022e+09	1.84319e+09	2.46192e+09	1.77409e+09	2.20665e+09	1.50865e+09
R side	1	2	3	4	5	6	7	8	9	10	11	12	13
1			0.202234	0.179193	0.16761	0.178408	0.283949	0.147289	0.173292	0.205577		0.192194
2			0.0925361	0.069485	0.0467394	0.0619217	0.109167	0.0702343	0.119029	0.161558		0.0913338
3			0.0361801	0.0449124	0.029945	0.0543778	0.0467711	0.0586068	0.0685597	0.0906116		0.0537456
4			0.194528	0.148153	0.111081	0.166317	0.12444	0.173809	0.145816	0.136147		0.150036
5			0.269827	0.338785	0.340336	0.324259	0.171333	0.222349	0.224441	0.165923		0.257157
6			0.0733541	0.107974	0.148156	0.119555	0.158911	0.254173	0.199545	0.163196		0.153108
7			0.0457536	0.0331137	0.056603	0.0260989	0.039905	0.0432707	0.0336264	0.0309969		0.038671
8			0.0855866	0.0783838	0.0995289	0.0690617	0.0655253	0.0302687	0.0356911	0.0459901		0.0637545
11.25.20A #1 two side
R side	1	2	3	4	5	6	7	8	9	10	11	12	13
1			1.19299e+08	2.70299e+08	1.90898e+08	2.01892e+08		3.98515e+08	2.5325e+08	3.53098e+08
2			9.1239e+07	9.18083e+07	1.01396e+08	1.05885e+08		1.14599e+08	2.30211e+08	2.56021e+08
3			7.67498e+07	83438665	9.16927e+07	8.76685e+07		1.14422e+08	1.19817e+08	2.78331e+08
4			2.25544e+08	2.3986e+08	1.58119e+08	1.47194e+08		4.23499e+08	2.16801e+08	4.4827e+08
5			3.45828e+08	6.90771e+08	4.44288e+08	4.11785e+08		8.25542e+08	4.38466e+08	3.66932e+08
6			1.20559e+08	1.53601e+08	3.67133e+08	4.33597e+08		4.11039e+08	5.31999e+08	4.70456e+08
7			6.14681e+07	5.88179e+07	7.67053e+07	6.71052e+07		1.20195e+08	1.61669e+08	1.23608e+08
8			129686004	9.5636e+07	1.19617e+08	3.50617e+07		9.4055e+07	9.45847e+07	9.08288e+07
			1.17037e+09	1.68423e+09	1.54985e+09	1.49019e+09		2.50186e+09	2.0468e+09	2.38754e+09
R side	1	2	3	4	5	6	7	8	9	10	11	12	13
1			0.101932	0.160488	0.123172	0.135481		0.159287	0.12373	0.147892		0.135997
2			0.0779572	0.0545105	0.0654235	0.0710551		0.0458052	0.112474	0.107232		0.076351
3			0.0655773	0.0495411	0.0591623	0.0588305		0.0457345	0.0585388	0.116576		0.0648515
4			0.192712	0.142415	0.102022	0.0987755		0.169273	0.105922	0.187754		0.142696
5			0.295485	0.41014	0.286665	0.276331		0.329971	0.21422	0.153686		0.280928
6			0.103009	0.0911993	0.236883	0.290968		0.164293	0.259918	0.197046		0.191902
7			0.0525201	0.0349227	0.0494921	0.0450313		0.048042	0.0789864	0.0517719		0.0515381
8			0.110807	0.0567832	0.0771798	0.0235284		0.037594	0.0462111	0.0380428		0.0557352
11.25.20A #3 two side
R side	1	2	3	4	5	6	7	8	9	10	11	12	13
1		4.08621e+08	6.00643e+08	397305827	2.11653e+08	3.04305e+08	1.29425e+08	2.72001e+08	1.62313e+08	1.47498e+08
2		2.36513e+08	3.06414e+08	2.85864e+08	2.39652e+08	2.20614e+08	1.65734e+08	277644992	2.7337e+08	1.8439e+08
3		2.19257e+08	2.57001e+08	222706325	1.97817e+08	1.83846e+08	1.3465e+08	2.04286e+08	1.82838e+08	1.97645e+08
4		5.41182e+08	7.78857e+08	5.86106e+08	3.41269e+08	5.05984e+08	2.41394e+08	2.55256e+08	1.77355e+08	1.9338e+08
5		6.53944e+08	7.23518e+08	1.05005e+09	7.45897e+08	6.46826e+08	4.16378e+08	3.73618e+08	6.66831e+08	479065999
6		4.39854e+08	3.82269e+08	4.31214e+08	4.04413e+08	3.31574e+08	2.90872e+08	4.74954e+08	2.86497e+08	3.45197e+08
7		1.61485e+08	9.44127e+07	1.75061e+08	7.58624e+07	75708445	5.07485e+07	9.01796e+07	45890864	56139888
8		1.66083e+08	2.69303e+08	2.71971e+08	1.03792e+08	6.36781e+07	3.55152e+07	6.37888e+07	6.0242e+07	4.09483e+07
		2.82694e+09	3.41242e+09	3.42028e+09	2.32036e+09	2.33253e+09	1.46472e+09	2.01173e+09	1.85534e+09	1.64426e+09
R side	1	2	3	4	5	6	7	8	9	10	11	12	13
1		0.144545	0.176017	0.116162	0.0912157	0.130461	0.0883615	0.135208	0.0874842	0.0897045		0.117684
2		0.083664	0.0897939	0.0835792	0.103283	0.0945814	0.113151	0.138013	0.147342	0.112141		0.107283
3		0.0775599	0.0753133	0.0651136	0.0852528	0.078818	0.0919288	0.101548	0.0985472	0.120202		0.0882537
4		0.191438	0.228242	0.171362	0.147076	0.216924	0.164806	0.126884	0.0955919	0.117609		0.162215
5		0.231326	0.212025	0.307007	0.321458	0.277306	0.284272	0.18572	0.359412	0.291356		0.274431
6		0.155594	0.112023	0.126076	0.174289	0.142152	0.198586	0.236093	0.154418	0.20994		0.167686
7		0.0571237	0.0276674	0.0511834	0.0326943	0.0324576	0.0346473	0.0448269	0.0247345	0.0341429		0.0377198
8		0.0587502	0.0789186	0.0795172	0.0447309	0.0272999	0.0242472	0.0317084	0.0324696	0.0249037		0.0447273
L side	1	2	3	4	5	6	7	8	9	10	11	12	13
1		3.86419e+08	2.35638e+08	2.4383e+08	3.50169e+08	2.8825e+08	3.64839e+08	5.44429e+08	3.40195e+08	1.87906e+08
2		3.93525e+08	1.92249e+08	2.36629e+08	2.02082e+08	2.51383e+08	229062933	4.04751e+08	2.06212e+08	2.52341e+08
3		3.43845e+08	1.65039e+08	1.75313e+08	1.81162e+08	2.24913e+08	2.3399e+08	2.78417e+08	1.88602e+08	2.91657e+08
4		6.12259e+08	2.40787e+08	3.29358e+08	5.84142e+08	5.4433e+08	4.59534e+08	4.16533e+08	4.90366e+08	3.69024e+08
5		8.46164e+08	7.05063e+08	5.10014e+08	9.90402e+08	5.96147e+08	5.45498e+08	6.36619e+08	6.49145e+08	5.43103e+08
6		2.85671e+08	1.65769e+08	1.81363e+08	307309803	4.65648e+08	3.23577e+08	5.40246e+08	6.3231e+08	7.5262e+08
7		1.30465e+08	7.21644e+07	6.75974e+07	8.72817e+07	9.19313e+07	5.89632e+07	1.45084e+08	1.16731e+08	1.81908e+08
8		1.20285e+08	8.16401e+07	1.06886e+08	1.16262e+08	9.49266e+07	70023057	7.66252e+07	9.56984e+07	9.78359e+07
		3.11863e+09	1.85835e+09	1.85099e+09	2.81881e+09	2.55753e+09	2.28549e+09	3.0427e+09	2.71926e+09	2.6764e+09
L side	1	2	3	4	5	6	7	8	9	10	11	12	13
1		0.123906	0.1268	0.131729	0.124226	0.112707	0.159633	0.178929	0.125106	0.0702086		0.128138
2		0.126185	0.103452	0.127839	0.0716905	0.0982914	0.100225	0.133023	0.0758339	0.0942838		0.103425
3		0.110255	0.0888093	0.0947133	0.064269	0.0879415	0.102381	0.0915032	0.069358	0.108974		0.0909115
4		0.196323	0.129571	0.177936	0.20723	0.212834	0.201066	0.136896	0.180331	0.137881		0.175563
5		0.271325	0.379403	0.275536	0.351354	0.233095	0.238679	0.209228	0.238721	0.202923		0.266696
6		0.0916012	0.0892021	0.0979813	0.109021	0.182069	0.141579	0.177555	0.23253	0.281207		0.155861
7		0.0418342	0.0388325	0.0365196	0.030964	0.0359454	0.025799	0.0476825	0.0429277	0.0679676		0.0409414
8		0.0385699	0.0439315	0.0577454	0.041245	0.0371166	0.0306381	0.0251833	0.0351928	0.0365551		0.0384642
		0.167231	0.192194	0.135997	0.117684	0.128138		0.148249
		0.0597871	0.0913338	0.076351	0.107283	0.103425		0.087636
		0.063836	0.0537456	0.0648515	0.0882537	0.0909115		0.0723197
		0.156745	0.150036	0.142696	0.162215	0.175563		0.157451
		0.32837	0.257157	0.280928	0.274431	0.266696		0.281517
		0.135393	0.153108	0.191902	0.167686	0.155861		0.16079
		0.0351364	0.038671	0.0515381	0.0377198	0.0409414		0.0408013
		0.0535013	0.0637545	0.0557352	0.0447273	0.0384642		0.0512365
		0.302624	0.345302	0.3279	0.28537	0.283999
		0.485115	0.407193	0.423624	0.436646	0.442259

## Sheet: N6910
1.18.21 #1 one side
	1	2	3	4	5	6	7	8	9	10	11	12	13
1			3.50922e+08	2.91149e+08	4.9187e+08	4.81438e+08	3.27267e+08	222737551	3.25527e+08	1.50764e+08
2			1.0286e+08	1.83443e+08	2.12873e+08	2.89768e+08	2.91032e+08	1.32151e+08	2.67543e+08	1.30579e+08
3			1.04164e+08	1.33441e+08	1.77624e+08	3.24604e+08	2.42866e+08	1.10568e+08	1.6983e+08	8.13359e+07
4			1.55226e+08	3.18001e+08	3.32577e+08	2.84412e+08	4.33292e+08	1.78213e+08	2.35247e+08	2.08881e+08
5			3.94736e+08	5.99001e+08	508093483	6.81772e+08	6.41437e+08	2.85948e+08	3.30984e+08	3.13757e+08
6			2.42374e+08	4.27625e+08	503024533	3.45358e+08	3.63706e+08	3.59475e+08	3.55551e+08	4.66869e+08
7			6.44214e+07	1.45666e+08	1.43736e+08	1.10058e+08	1.21567e+08	1.36295e+08	1.48279e+08	1.32787e+08
8			1.44936e+08	1.42643e+08	1.75818e+08	1.45545e+08	1.18389e+08	89438063	1.50051e+08	1.27383e+08
			1559640345	2.24097e+09	2.54562e+09	2.66296e+09	2.53955e+09	1.51483e+09	1983011477	1.61236e+09
	1	2	3	4	5	6	7	8	9	10	11	12	13
1			0.225002	0.129921	0.193222	0.180791	0.128868	0.147038	0.164158	0.0935051		0.157813
2			0.0659511	0.0818588	0.0836233	0.108814	0.114599	0.0872386	0.134917	0.0809865		0.0947487
3			0.0667873	0.0595461	0.0697765	0.121896	0.0956331	0.0729906	0.0856424	0.0504454		0.0778397
4			0.0995265	0.141903	0.130647	0.106803	0.170617	0.117646	0.118631	0.12955		0.126916
5			0.253094	0.267295	0.199596	0.256021	0.252578	0.188766	0.16691	0.194595		0.222357
6			0.155404	0.190822	0.197604	0.12969	0.143217	0.237305	0.179298	0.289557		0.190362
7			0.0413053	0.0650014	0.0564641	0.0413295	0.0478694	0.0899738	0.0747748	0.0823561		0.0623843
8			0.0929293	0.0636525	0.069067	0.0546556	0.046618	0.0590418	0.0756684	0.0790043		0.0675796
7.1.21 #2 one side
	1	2	3	4	5	6	7	8	9	10	11	12	13
1		5.10922e+08	3.8138e+08	4.9942e+08	4.84568e+08	4.57932e+08	405297700	5.50093e+08	4.8552e+08	3.42328e+08
2		1.45474e+08	1.861e+08	1.41728e+08	1.82092e+08	2.04512e+08	1.88413e+08	2.20263e+08	3.77212e+08	2.06608e+08
3		1.34894e+08	2.11121e+08	161722833	1.04512e+08	2.27086e+08	2.72325e+08	2.34373e+08	2.82071e+08	2.43294e+08
4		3.4005e+08	618165055	4.88034e+08	2.62109e+08	5.04799e+08	367773479	2.63318e+08	3.30338e+08	3.63353e+08
5		9.13662e+08	1.25348e+09	8.75856e+08	5.93666e+08	687216266	4.67662e+08	5.38144e+08	7.49651e+08	5.88948e+08
6		2.23198e+08	4.33861e+08	3.36761e+08	3.69585e+08	4.26709e+08	4.43861e+08	4.33408e+08	3.77205e+08	4.5331e+08
7		1.37765e+08	1.7322e+08	1.91053e+08	2.08074e+08	1.23439e+08	1.36577e+08	1.54139e+08	1.32751e+08	1.66143e+08
8		2.62506e+08	2.97744e+08	2.11108e+08	2.25274e+08	1.45192e+08	1.4715e+08	1.32411e+08	1.45326e+08	1.55797e+08
		2.66847e+09	3.55507e+09	2.90568e+09	2.42988e+09	2776886637	2.42906e+09	2.52615e+09	2.88007e+09	2.51978e+09
	1	2	3	4	5	6	7	8	9	10	11	12	13
1		0.191466	0.107278	0.171877	0.199421	0.164909	0.166854	0.21776	0.168579	0.135856		0.169333
2		0.054516	0.0523478	0.0487761	0.0749386	0.073648	0.0775663	0.0871932	0.130973	0.0819945		0.0757726
3		0.0505511	0.0593857	0.0556574	0.0430113	0.0817771	0.112111	0.0927788	0.0979388	0.0965537		0.0766406
4		0.127432	0.173882	0.167958	0.107869	0.181786	0.151406	0.104237	0.114698	0.1442		0.141497
5		0.342392	0.35259	0.301429	0.244319	0.247477	0.192528	0.21303	0.260289	0.23373		0.265309
6		0.0836427	0.12204	0.115897	0.1521	0.153665	0.18273	0.171569	0.130971	0.1799		0.143613
7		0.0516271	0.0487247	0.0657517	0.0856314	0.0444523	0.0562264	0.0610173	0.0460928	0.0659354		0.0583843
8		0.0983733	0.0837519	0.0726534	0.0927101	0.0522861	0.060579	0.0524162	0.0504592	0.0618295		0.069451
12.16.20 #2 two side
R side
	1	2	3	4	5	6	7	8	9	10	11	12	13
1	2.74751e+08	3.12777e+08	3.1444e+08	5.19144e+08	3.12732e+08	494256844	2.31715e+08	4.05128e+08	2.75659e+08	2.89069e+08
2	6.35772e+07	1.91575e+08	1.31646e+08	1.63371e+08	2.04197e+08	2.05072e+08	2.13992e+08	1.3049e+08	1.59895e+08	1.27312e+08
3	1.07289e+08	145476125	1.29247e+08	141137067	1.18198e+08	1.63379e+08	3.49102e+08	1.46353e+08	1.42268e+08	1.26021e+08
4	3.86839e+08	5.3046e+08	4.20839e+08	3.38471e+08	2.46068e+08	3.86282e+08	4.1568e+08	243863336	1.28711e+08	2.50223e+08
5	6.54663e+08	7.36153e+08	8.62752e+08	4.67834e+08	5.93314e+08	3.989e+08	7.61133e+08	5.18568e+08	5.54475e+08	5.31335e+08
6	1.46458e+08	2.42769e+08	3.32817e+08	3.16137e+08	3.87244e+08	4.87713e+08	2.88149e+08	4.39259e+08	6.05853e+08	3.72829e+08
7	1.36687e+08	1.41655e+08	1.55207e+08	1.21114e+08	1.38702e+08	1.59259e+08	1.30342e+08	2.32012e+08	1.82032e+08	1.17647e+08
8	2.40762e+08	268866296	2.38561e+08	1.6614e+08	1.73176e+08	2.31907e+08	2.13282e+08	2.77604e+08	161007612	116783670
	2.01103e+09	2.56973e+09	2.58551e+09	2.23335e+09	2.17363e+09	2.52677e+09	2.60339e+09	2.39328e+09	2.2099e+09	1.93122e+09
	1	2	3	4	5	6	7	8	9	10	11	12	13
1	0.136623	0.121716	0.121616	0.232451	0.143875	0.195608	0.0890049	0.169278	0.124738	0.149682		0.148459
2	0.0316143	0.0745505	0.050917	0.0731508	0.0939427	0.0811597	0.0821973	0.0545236	0.0723539	0.065923		0.0680333
3	0.0533501	0.0566114	0.0499889	0.0631953	0.0543781	0.0646593	0.134095	0.0611518	0.0643776	0.0652547		0.0667062
4	0.192359	0.206426	0.162768	0.151553	0.113206	0.152876	0.159669	0.101895	0.0582427	0.129568		0.142856
5	0.325537	0.286471	0.333688	0.209476	0.27296	0.15787	0.292362	0.216677	0.250905	0.275129		0.262107
6	0.0728276	0.0944724	0.128724	0.141553	0.178155	0.193019	0.110682	0.183539	0.274154	0.193053		0.157018
7	0.0679687	0.0551243	0.0600298	0.0542298	0.0638112	0.0630286	0.0500662	0.0969433	0.0823713	0.0609186		0.0654492
8	0.119721	0.104628	0.0922684	0.0743905	0.0796713	0.09178	0.0819244	0.115993	0.0728574	0.0604715		0.0893706
L side
	1	2	3	4	5	6	7	8	9	10	11	12	13
1				6.19173e+08	6.62459e+08	5.90961e+08	5.83253e+08	3.89628e+08	4.10332e+08	1.60992e+08
2				2.70635e+08	1.36865e+08	1.73838e+08	3.80152e+08	2.34151e+08	1.15954e+08	1.09147e+08
3				1.81934e+08	1.82052e+08	1.3036e+08	2.29585e+08	1.11881e+08	1.50203e+08	1.03677e+08
4				3.43616e+08	425825123	4.40627e+08	3.88594e+08	2.05549e+08	210696591	1.66477e+08
5				1.01116e+09	7.04051e+08	743592915	4.42022e+08	4.5791e+08	4.13465e+08	3.31661e+08
6				3.44162e+08	3.31154e+08	5.24585e+08	4.86548e+08	3.78887e+08	4.07722e+08	362033909
7				1.73525e+08	1.886e+08	2.57077e+08	2.37725e+08	1.7621e+08	2.03827e+08	1.55415e+08
8				2.83331e+08	2.50324e+08	2.40488e+08	1.61456e+08	1.59197e+08	1.90312e+08	1.64583e+08
				3.22753e+09	2.88133e+09	3.10153e+09	2.90934e+09	2.11341e+09	2.10251e+09	1.55399e+09
	1	2	3	4	5	6	7	8	9	10	11	12	13
1				0.191841	0.229914	0.190539	0.200476	0.18436	0.195163	0.103599		0.185127
2				0.083852	0.0475005	0.0560492	0.130666	0.110793	0.0551502	0.0702368		0.0791782
3				0.0563693	0.0631833	0.0420308	0.0789132	0.0529386	0.0714399	0.0667166		0.061656
4				0.106464	0.147788	0.142068	0.133568	0.0972593	0.100212	0.107129		0.119213
5				0.313291	0.244349	0.23975	0.151932	0.216669	0.196653	0.213426		0.225153
6				0.106633	0.114931	0.169138	0.167237	0.179277	0.193921	0.232971		0.166301
7				0.0537639	0.0654559	0.0828872	0.0817112	0.0833771	0.0969445	0.100011		0.0805929
8				0.0877857	0.086878	0.0775385	0.0554957	0.0753269	0.0905167	0.10591		0.0827788
12.16.20 #3 one side
	1	2	3	4	5	6	7	8	9	10	11	12	13
1			4.29476e+08	3.33685e+08	4.00485e+08	3.89274e+08	7.8182e+08	250065641
2			147347471	8.80191e+07	9.24636e+07	2.05182e+08	2.50729e+08	2.92462e+08
3			1.5677e+08	1.16931e+08	95196036	1.30046e+08	126215413	1.23787e+08
4			4.10387e+08	3.21602e+08	2.08222e+08	2.74413e+08	1.89798e+08	3.02472e+08
5			4.94702e+08	3.16647e+08	240326085	6.93695e+08	4.52797e+08	2.66706e+08
6			3.05703e+08	2.93947e+08	4.28076e+08	3.96547e+08	5.28109e+08	3.32114e+08
7			1.39933e+08	2.23485e+08	1.78144e+08	1.53345e+08	2.70417e+08	1.41014e+08
8			2.66438e+08	270458945	2.26894e+08	1.37845e+08	2.47353e+08	6.41618e+07
			2.35076e+09	1.96478e+09	1869806627	2.38035e+09	2.84724e+09	1.77278e+09
	1	2	3	4	5	6	7	8	9	10	11	12	13
1			0.182697	0.169834	0.214185	0.163536	0.274589	0.141058			0.190983
2			0.0626809	0.0447985	0.0494509	0.0861983	0.0880604	0.164974			0.0826938
3			0.0666893	0.0595137	0.0509122	0.054633	0.044329	0.0698265			0.0576506
4			0.174577	0.163684	0.11136	0.115283	0.0666605	0.17062			0.133697
5			0.210444	0.161162	0.12853	0.291426	0.15903	0.150445			0.183506
6			0.130045	0.149608	0.228941	0.166592	0.185481	0.18734			0.174668
7			0.0595268	0.113746	0.0952742	0.0644214	0.0949752	0.0795439			0.0845813
8			0.113341	0.137654	0.121346	0.0579097	0.0868748	0.0361927			0.0922197
		0.157813	0.169333	0.148459	0.185127	0.190983		0.170343
		0.0947487	0.0757726	0.0680333	0.0791782	0.0826938		0.0800853
		0.0778397	0.0766406	0.0667062	0.061656	0.0576506		0.0680986
		0.126916	0.141497	0.142856	0.119213	0.133697		0.132836
		0.222357	0.265309	0.262107	0.225153	0.183506		0.231687
		0.190362	0.143613	0.157018	0.166301	0.174668		0.166392
		0.0623843	0.0583843	0.0654492	0.0805929	0.0845813		0.0702784
		0.0675796	0.069451	0.0893706	0.0827788	0.0922197		0.0802799
		0.348175	0.312946	0.305477	0.351429	0.365651
		0.349273	0.406806	0.404964	0.344366	0.317203
