# Supplementary material for: Coordinated cadherin functions sculpt respiratory motor circuit connectivity
Source: eLife. 2022 Dec 30;11:e82116. doi: 10.7554/eLife.82116 (PMC9910829; doi:10.7554/eLife.82116)
Supplement: Figure 4—source data 1. [file elife-82116-fig4-data1.xlsx]

## Sheet: Integrated area
Wt/ctrl	Ncad	6910	N6910
2961.03	3530.35	5334.57	1216.37
2204.25	2459.41	7698.07	33.6388
2058.61	1771.34	2192.78	46.2402
4568.8	4759.04	10487.3	779.034
4161.17	4481.8	6006.56	412.946
3057.94		6564.37	18.003
3105.72		4153.24	755.012
		5348.67	2670.88
			1721.91
			938.819
			2623.42
