# Supplementary material for: Coordinated cadherin functions sculpt respiratory motor circuit connectivity
Source: eLife. 2022 Dec 30;11:e82116. doi: 10.7554/eLife.82116 (PMC9910829; doi:10.7554/eLife.82116)
Supplement: Figure 4—source data 2. [file elife-82116-fig4-data2.xlsx]

## Sheet: WT
File Name	Cursor 1	Cursor 2	Total seconds	Total integrated activity	Normalized per sec
2020_10_31_0023
	120.211	120.392	0.1817	2208.59	12155.1
	176.223	176.448	0.22562	2512.28	11135
	325.999	326.252	0.25246	3745.08	14834.4
	403.507	403.919	0.41194	3378.16	8200.62
	484.373	484.586	0.2138	2634.5	12322.2
	35.1289	35.4103	0.28134	2872.19	10209
	129.789	130.013	0.224568	2781.47	12385.8
			0.255918	2876.04	11606
2020_10_31_0027
	41.0659	41.1834	0.117443	2591.77	22068.3
	234.29	234.634	0.34319	3456.32	10071.2
	251.051	251.13	0.07871	1095.36	13916.3
	262.255	262.334	0.079	1673.55	21184.1
	525.54	525.624	0.0831775	1408.75	16936.6
	528.978	529.067	0.0897938	1818.12	20247.7
	588.574	588.861	0.286716	3576.06	12472.5
			0.154004	2231.42	16699.5
2021_01_09_0012
	300.991	301.717	0.72636	2709.72	3730.55
	324.678	325.293	0.61516	2275.27	3698.66
	332.359	332.81	0.45134	1559.4	3455.04
	263.705	264.324	0.61951	1690.04	2728.02
	46.8106	46.9746	0.164023	811.606	4948.12
	50.8769	51.3626	0.485759	1626.2	3347.75
	58.4811	59.078	0.596835	1199.56	2009.87
			0.522712	1695.97	3416.86
2021_01_09_0014
	173.543	173.938	0.39439	5086.16	12896.3
	190.237	190.416	0.17917	2640.54	14737.6
	194.424	194.716	0.2913	4033.88	13847.9
	197.147	197.573	0.42553	6514.61	15309.4
	524.945	525.307	0.362107	4225.06	11668
	548.002	548.469	0.466399	4533.9	9721.06
	583.139	583.48	0.340654	4174.18	12253.4
			0.351364	4458.33	12919.1
2021_05_27_0001
	385.181	385.84	0.65902	3869.85	5872.13
	430.776	431.395	0.61899	2967.23	4793.66
	549.272	550.286	1.01373	5639.36	5562.98
	567.257	568.65	1.39338	4168.25	2991.47
	593.594	593.693	0.0995999	1791.92	17991.1
	599.213	600.125	0.912288	4480.88	4911.7
	478.176	478.918	0.741725	3700.78	4989.41
			0.776962	3802.61	6730.36
2021_10_22_0002
	11.8863	12.0621	0.175759	2256.36	12837.8
	182.965	183.325	0.36026	3763.08	10445.4
	190.368	190.535	0.16733	2641.84	15788.2
	198.983	199.235	0.25156	3570.48	14193.4
	448.225	448.571	0.346026	5949.48	17193.8
	453.604	453.825	0.220283	3741.47	16984.8
	463.913	464.066	0.153445	4329.19	28213.2
			0.239238	3750.27	16522.4
2021_10_22_0007
	50.604	50.9673	0.363327	2723.48	7495.96
	91.5409	92.3487	0.807795	4144.23	5130.29
	136.79	137.182	0.39189	2065.04	5269.43
	171.315	171.728	0.41234	3490.15	8464.25
	243.304	243.628	0.32427	2646.75	8162.18
	285.617	285.947	0.329533	3541.67	10747.5
	331.548	331.886	0.33755	3380.28	10014.2
			0.423815	3141.66	7897.69

## Sheet: 6910
File Name	Cursor 1	Cursor 2	Total seconds	Total integrated activity	Normalized per sec
2021_04_13_0004
	92.2733	93.2106	0.937291	5176.48	5522.82
	150.946	151.782	0.835731	3979.49	4761.69
	214.776	215.604	0.827943	5337.96	6447.25
	439.634	440.74	1.10646	6844.34	6185.8
	289.347	290.3	0.952335	5835.99	6128.08
	361.114	362.078	0.96368	5335.24	5536.32
	582.874	582.993	0.118992	1141.63	9594.21
			0.820347	4807.3	6310.88
2021_04_22_0002 to 0004
	267.923	270.375	2.4523	8639.36	3522.96
	532.344	534.319	1.9754	8846.7	4478.43
	106.157	107.727	1.57	5608.16	3572.08
	156.923	158.594	1.6708	7749.33	4638.1
	326.288	327.643	1.35546	6798.06	5015.33
	481.357	483.349	1.99238	8512.26	4272.4
	240.524	241.919	1.3952	5884.34	4217.57
			1.77308	7434.03	4245.27
2021_05_01_0011
	135.065	135.21	0.588759	647.438	1099.67
	198.281	198.963	0.682443	5437.5	7967.7
	234.774	234.894	0.11995	1084.04	9037.44
	323.575	323.674	0.09877	1602.13	16220.8
	14.5115	14.6291	0.117638	1020.28	8673.04
	87.0225	87.1529	0.130358	740.072	5677.21
	301.144	301.246	0.101514	813.053	8009.29
			0.262776	1620.65	8097.88
2021_07_02_0001 to 0002
	169.625	170.686	1.06091	5216.72	4917.23
	350.391	351.414	1.02315	5761.8	5631.43
	544.089	545.059	0.969944	5494.93	5665.2
	68.7344	69.7019	0.967467	5887	6084.96
	262.944	263.936	0.992195	6675.5	6728.02
	450.952	451.748	0.796681	5621.43	7056.06
	622.648	623.485	0.83692	5842.32	6980.74
			0.949609	5785.67	6151.95
2021_08_25_0002
	66.9064	68.0869	1.18052	11872	10056.7
	104.757	104.87	0.11381	2557.76	22474
	148.84	149.545	0.70538	4630.56	6564.63
	274.486	275.687	1.2011	7197.1	5992.09
	292.878	293.267	0.38878	3301.45	8491.82
	298.571	299.966	1.39536	11252.4	8064.18
	409.252	409.359	0.107021	1807.35	16887.8
			0.727423	6088.38	11218.7
2021_09_28_ 0002
	15.3076	16.3312	1.02354	5215.97	5096.01
	138.341	138.877	0.535517	2230.31	4164.78
	231.356	232.429	1.0736	6621.38	6167.45
	202.391	203.003	0.61242	2545.29	4156.11
	3.52035	4.05149	0.53114	2278.15	4289.18
	173.626	174.152	0.525741	1323.47	2517.34
	229.01	229.549	0.539108	2846.98	5280.91
			0.691581	3294.51	4524.54
2021_09_28_0006
	2.08094	2.94039	0.859448	5612.74	6530.63
	155.364	156.295	0.931158	6560.93	7045.99
	621.892	622.753	0.861051	5444.89	6323.54
	343.46	343.915	0.45504	3776.12	8298.44
	228.964	229.921	0.95704	6584.85	6880.44
	252.747	252.837	0.0908782	1381.93	15206.4
	394.651	395.386	0.73436	3845.83	5236.98
			0.698425	4743.9	7931.77

## Sheet: Ncad
File Name	Cursor 1	Cursor 2	Total seconds	Total integrated activity	Normalized per sec
2020_10_31_0002 to 0005
	241.576	242.236	0.660246	3286.01	4976.95
	531.243	532.024	0.78065	3694.96	4733.18
	260.328	260.985	0.65776	3700.62	5626.09
	500.472	501.005	0.53302	3439.79	6453.4
	70.4668	71.235	0.768203	5074.06	6605.11
	360.147	360.835	0.688203	3649.32	5302.68
	30.992	31.3028	0.3108	1553.56	4998.59
			0.628412	3485.47	5528
2020_10_31_0008 to 0010
	226.767	227.057	0.29032	1541.32	5309.02
	402.005	402.678	0.6726	3107.89	4620.71
	629.065	629.641	0.57653	2801.13	4858.6
	209.261	209.761	0.50088	2387.3	4766.2
	423.905	424.293	0.387555	2077.63	5360.87
	638.875	639.495	0.619918	2980.44	4807.8
	210.234	210.821	0.586331	3430.96	5851.57
			0.519162	2618.09	5082.11
2020_10_31_0012 to 0013
	453.832	454.576	0.743993	1919.79	2580.38
	598.791	599.541	0.75005	1867.95	2490.44
	45.3503	46.1536	0.803217	1691.42	2105.81
	203.71	204.341	0.63088	1752.49	2777.86
	354.801	355.615	0.81425	1724.55	2117.96
	497.073	497.659	0.58674	1916.88	3267
	659.312	659.909	0.596024	2219.79	3724.33
			0.703593	1870.41	2723.4
2020_10_31_0020
	136.145	136.533	0.38798	3051.37	7864.77
	254.655	255.164	0.50902	4116.51	8087.12
	403.585	404.098	0.51373	5487.74	10682.2
	548.186	548.944	0.75827	6380.53	8414.59
	695.702	696.025	0.323055	3458.96	10707.1
	82.5973	82.8615	0.264169	3108.18	11765.9
	214.078	214.553	0.475177	3776.54	7947.65
			0.461629	4197.12	9352.74
2021_01_09_0001 to 0002
	36.177	37.0421	0.865031	3866.98	4470.34
	161.983	162.783	0.80011	4023.42	5028.58
	395.855	396.6	0.7446	4334.77	5821.61
	636.569	637.428	0.85859	5702.03	6641.15
	520.113	520.983	0.869591	6827.82	7851.76
	94.8491	95.7926	0.943527	7268.45	7703.49
	229.328	230.116	0.788064	6700.76	8502.81
			0.838502	5532.03	6574.25

## Sheet: N6910
File Name	Cursor 1	Cursor 2	Total seconds	Total integrated activity	Normalized per sec
2021_04_07_0001 to 0003
	68.5164	69.1255	0.609063	1062.44	1744.38
	139.369	140.09	0.72111	1395.12	1934.69
	285.809	286.325	0.515405	979.311	1900.08
	421.825	422.448	0.623038	1223.85	1964.32
	571.081	571.776	0.69489	1267.19	1823.58
	163.204	163.898	0.693307	1147.15	1654.61
	322.947	323.506	0.558609	1035.94	1854.5
			0.630774	1158.71	1839.45
2021_04_08_0003
	92.1999	92.9004	0.700515	23.753	33.9079
	222.3	223.001	0.70046	30.9961	44.2511
	344.002	344.699	0.69655	27.0613	38.8504
	527.301	528.002	0.70038	52.7449	75.3089
	11.0005	11.7017	0.701258	4.68746	6.68436
	160.999	161.7	0.700321	3.6574	5.22247
	593	593.7	0.700804	5.83742	8.32961
				21.2482	30.365
2021_04_13_0000
	8.00092	8.70059	0.69967	64.416	92.0664
			0.7	89.6081	128.012
	47.0021	47.6962	0.694089	29.5965	42.6408
	74.0014	74.7015	0.700075	1.34008	1.91419
	17.0016	17.7003	0.698669	85.9887	123.075
	37.9998	38.6996	0.699808	71.3637	101.976
	62	62.7008	0.700768	29.5725	42.2001
				53.1265	75.9834
2021_05_01_0002
	301.423	301.836	0.412755	1283.52	3109.63
	206.63	206.811	0.181594	782.033	4306.48
	177.168	177.256	0.0876448	250.517	2858.32
	496.001	496.199	0.19741	800.067	4052.82
	13.999	14.1831	0.18404	758.59	4121.88
	360.924	360.994	0.0694398	284.485	4096.86
	458.283	458.354	0.0707507	325.488	4600.48
			0.171948	640.671	3878.07
2021_05_05_0000
	295.34	295.387	0.04721	200.778	4252.86
	366.521	366.566	0.04526	143.522	3171.06
	474.577	474.613	0.03651	134.541	3685.04
	558.652	559.393	0.7409	1172.94	1583.13
	13.7027	13.7968	0.0940233	558.435	5939.32
	80.1906	80.238	0.0474919	283.074	5960.47
	112.685	113.317	0.631677	2624.62	4155
			0.234725	731.13	4106.7
2021_06_08_0006 to 0007
	13.9996	14.7009	0.70132	14.2525	20.3224
	43.0007	43.7002	0.699495	14.6284	20.9129
	80.0024	80.7008	0.698442	12.7088	18.196
	125.001	125.702	0.70031	30.4224	43.4413
	24.0003	24.7011	0.700813	20.4841	29.229
	62.0012	62.7003	0.699011	16.1109	23.0481
	103.001	103.7	0.699255	24.6235	35.2139
				19.0329	27.1948
2021_07_21_0000
	48.4771	49.0799	0.602776	755.012	1252.56
2021_09_09_0000
	39.8924	40.8596	0.967262	3019.14	3121.32
	206.222	207.317	1.09496	3025.43	2763.05
	353.823	354.557	0.7345	2414.87	3287.78
	496.42	497.127	0.70763	2224.1	3057.38
	577.858	577.914	0.0556923	301.055	3036.07
	584.288	584.342	0.0548215	250.637	3127.08
	597.677	597.742	0.0659277	240.998	3073.51
			0.525828	1639.46	3066.6
2021_09_18_0002 to 0003
	76.2067	76.9151	0.708396	1978.27	2792.61
	485.937	486.411	0.474439	1465.55	3089.01
			0.591417	1721.91	2940.81
2021_10_19_0000 to 0001
	57.2176	57.8786	0.660974	916.034	1385.88
	258.331	259.012	0.68034	908.056	1334.71
	523.031	523.718	0.68677	992.367	1444.98
			0.676028	938.819	1388.52
2022_01_09_0004 to 0005
	53.5096	54.3005	0.790841	3102.26	3922.74
	263.868	264.64	0.77212	2144.58	2777.52
			0.781481	2623.42	3350.13
