# Supplementary material for: Coordinated cadherin functions sculpt respiratory motor circuit connectivity
Source: eLife. 2022 Dec 30;11:e82116. doi: 10.7554/eLife.82116 (PMC9910829; doi:10.7554/eLife.82116)
Supplement: Figure 6—source data 1. [file elife-82116-fig6-data1.xlsx]

## Sheet: Integrated area
ctrl	bg dbx1-cre
3662.12	2227.42
1430.13	2843.63
2605.59	562.114
4142.25	2404.43
3350.75	653.295
	837.645
3038.17
